# Supplementary material
Source: MDPI journal article supplement (https://www.mdpi.com/1424-8247/16/7/946)
Supplement: s1 [file s1]

## Supplementary materials

### Novel Thiazolidine-2,4-Dione-Trimethoxybenzene-Thiazole Hybrids as Human Topoisomerases Inhibitors

Maria Stefania Sinicropi<sup>1,†</sup>, Jessica Ceramella<sup>1,†</sup>, Patrice Vanelle<sup>2</sup>, Domenico Iacopetta<sup>1\*</sup>, Camillo Rosano<sup>3</sup>, Omar Khoumeri<sup>2</sup>, Shawkat Abdelmohsen<sup>4</sup>, Wafaa Abdelhady<sup>4</sup> and Hussein El-Kashef<sup>4,5\*</sup>

<sup>1</sup> Department of Pharmacy, Health and Nutritional Sciences, University of Calabria, 87036 Arcavacata di Rende, Italy. s.sinicropi@unical.it (M.S.S.); jessica.ceramella@unical.it (J.C.).

<sup>2</sup> Aix Marseille University, CNRS, ICR UMR 7273, Equipe Pharmaco-Chimie Radicalaire, Faculté de Pharmacie, 27 Boulevard Jean Moulin, CS30064, 13385, Marseille Cedex 05, France. patrice.vanelle@univ-amu.fr (P.V.); omar.khoumeri@univ-amu.fr (O.K.).

<sup>3</sup> U.O. Proteomica e Spettrometria di Massa, IRCCS Ospedale Policlinico San Martino, Largo R. Benzi 10, 16132 Genova, Italy. camillo.rosano@hsanmartino.it (C.R.)

<sup>4</sup> Department of Chemistry, Faculty of Science, Assiut University, 71516 Assiut, Egypt. shawk662001@yahoo.com (S.A.); wafaahadi13@gmail.com (W.A.).

<sup>5</sup> Faculty of Pharmacy, Sphinx University, 71684 New Assiut, Egypt.

<sup>†</sup>These authors equally contributed.

\* Correspondence: domenico.iacopetta@unical.it (D.I.), Tel. +39-0984-493200; elkashef@aun.edu.eg (H.E.K.), Tel. +20 1005075881

## Contents

IR spectra, <sup>1</sup>H- and <sup>13</sup>C-NMR spectra

### 1) IR spectra

**Fig. S1.** IR spectrum of 1,3-thiazolidine-2,4-dione (**1**).

**Fig. S2.** IR spectrum of (Z)-5-(3,4,5-Trimethoxybenzylidene)thiazolidine-2,4-dione (**2**).

**Fig. S3.** IR spectrum of potassium (Z)-5-(3,4,5-Trimethoxybenzylidene)thiazolidine-2,4-dione-3-ide (**3**).

**Fig. S4.** IR spectrum of 2-amino-4-phenylthiazole (**4b**).

**Fig. S5.** IR spectrum of 2-amino-4-(4-methylphenyl)thiazole (**4c**).

**Fig. S6.** IR spectrum of 2-amino-4-(4-chlorophenyl)thiazole (**4d**).

**Fig. S7.** IR spectrum of 2-amino-4-(4-bromophenyl)thiazole (**4e**).

**Fig. S8.** IR spectrum of 2-chloro-N-(thiazol-2-yl)acetamide (**5a**).

**Fig. S9.** IR spectrum of 2-chloro-N-(4-phenylthiazol-2-yl)acetamide (**5b**).

**Fig. S10.** IR spectrum of 2-chloro-N-(4-methylphenylthiazol-2-yl)acetamide (**5c**).

**Fig. S11.** IR spectrum of 2-chloro-N-(4-chlorophenylthiazol-2-yl)acetamide (**5d**).

**Fig. S12.** IR spectrum of 2-chloro-N-(4-bromophenylthiazol-2-yl)acetamide (**5e**).

**Fig. S13.** IR spectrum of 2-chloro-N-(benzo[d]thiazol-2-yl)acetamide (**5f**).

**Fig. S14.** IR spectrum of 2-iodo-N-(thiazol-2-yl)acetamide (**6a**).

**Fig. S15.** IR spectrum of 2-iodo-N-(4-phenylthiazol-2-yl)acetamide (**6b**).

**Fig. S16.** IR spectrum of 2-iodo-N-(4-methylphenylthiazol-2-yl)acetamide (**6c**).

**Fig. S17.** IR spectrum of 2-iodo -N-(4-chlorophenylthiazol-2-yl)acetamide (**6d**).

**Fig. S18.** IR spectrum of 2-iodo -N-(4-bromophenylthiazol-2-yl)acetamide (**6e**).

**Fig. S19.** IR spectrum of 2-iodo-N-(benzo[*d*]thiazol-2-yl)acetamide (**6f**).

**Fig. S20.** IR spectrum of (Z)-2-(5-(3,4,5-trimethoxybenzylidene)thiazolidin-2,4-dion-3-yl)-N-(thiazol-2-yl)acetamide (**7a**).

**Fig. S21.** IR spectrum of (Z)-2-(5-(3,4,5-trimethoxybenzylidene)thiazolidine-2,4-dion-3-yl)-N-(4-phenylthiazole-2-yl)acetamide (**7b**).

**Fig. S22.** IR spectrum of (Z)-2-(5-(3,4,5-trimethoxybenzylidene)thiazolidin-2,4-dion-3-yl)-N-(4-(4-methylphenyl)thiazol-2-yl)acetamide (**7c**).

**Fig. S23.** IR spectrum of (Z)-2-(5-(3,4,5-trimethoxybenzylidene)thiazolidin-2,4-dion-3-yl)-N-(4-(4-chlorophenyl)thiazol-2-yl)acetamide (**7d**).

**Fig. S24.** IR spectrum of (Z)-2-(5-(3,4,5-trimethoxybenzylidene)thiazolidin-2,4-dion-3-yl)-N-(4-(4-bromophenyl)thiazol-2-yl)acetamide (**7e**).

**Fig. S25.** IR spectrum of (Z)-2-(5-(3,4,5-trimethoxybenzylidene)thiazolidin-2,4-dion-3-yl)-N-(benzo[*d*]thiazol-2-yl)acetamide (**7e**).

## **2) <sup>1</sup>H- and <sup>13</sup>C-NMR spectra in DMSO-*d*<sub>6</sub> if not otherwise indicated**

**Fig. S26.** <sup>1</sup>H-NMR spectrum of (Z)-5-(3,4,5-Trimethoxybenzylidene) thiazolidine-2,4-dione (**2**).

**Fig. S27.** <sup>13</sup>C-NMR spectrum of (Z)-5-(3,4,5-Trimethoxybenzylidene)thiazolidine-2,4-dione (**2**).

**Fig. S28.** <sup>1</sup>H-NMR spectrum of potassium (Z)-5-(3,4,5-Trimethoxybenzylidene)thiazolidine-2,4-dion-3-ide (**3**).

**Fig. S29.** <sup>13</sup>C-NMR spectrum of potassium (Z)-5-(3,4,5-Trimethoxybenzylidene)thiazolidine-2,4-dion-3-ide (**3**).

**Fig. S30.** <sup>1</sup>H-NMR spectrum (CDCl<sub>3</sub>) of 2-chloro-N-(thiazol-2-yl)acetamide (**5a**).

**Fig. S31.** <sup>1</sup>H-NMR spectrum (CDCl<sub>3</sub>) of 2-chloro-N-(4-phenylthiazol-2-yl)acetamide (**5b**).

**Fig. S32.** <sup>1</sup>H-NMR spectrum (CDCl<sub>3</sub>) of 2-chloro-N-(4-methylphenylthiazol-2-yl)acetamide (**5c**).

**Fig. S33.** <sup>1</sup>H-NMR spectrum (CDCl<sub>3</sub>) of 2-chloro-N-(4-chlorophenylthiazol-2-yl)acetamide (**5d**).

**Fig. S34.** <sup>1</sup>H-NMR spectrum (CDCl<sub>3</sub>) of 2-chloro -N-(4-bromophenylthiazol-2-yl)acetamide (**5e**).

**Fig. S35.** <sup>1</sup>H-NMR spectrum (CDCl<sub>3</sub>) of 2-chloro-N-(benzo[*d*]thiazol-2-yl)acetamide (**5f**).

**Fig. S36.** <sup>1</sup>H-NMR spectrum of 2-iodo-N-(thiazol-2-yl)acetamide (**6a**).

**Fig. S37.** <sup>13</sup>C-NMR spectrum (CDCl<sub>3</sub>) of 2-iodo-N-(thiazol-2-yl)acetamide (**6a**).

**Fig. S38.** <sup>1</sup>H-NMR spectrum of 2-iodo-N-(4-phenylthiazol-2-yl)acetamide (**6b**).

**Fig. S39.**  $^{13}\text{C}$ -NMR spectrum of 2-iodo-N-(4-phenylthiazol-2-yl)acetamide (**6b**).

**Fig. S40.**  $^1\text{H}$ -NMR spectrum of 2-iodo-N-(4-methylphenylthiazol-2-yl)acetamide (**6c**).

**Fig. S41.**  $^{13}\text{C}$ -NMR spectrum of 2-iodo-N-(4-methyl phenylthiazol-2-yl)acetamide (**6c**).

**Fig. S42.**  $^1\text{H}$ -NMR spectrum of 2-iodo-N-(4-chlorophenylthiazol-2-yl)acetamide (**6d**).

**Fig. S43.**  $^{13}\text{C}$ -NMR spectrum of 2-iodo-N-(4-chlorophenylthiazol-2-yl)acetamide (**6d**).

**Fig. S44.**  $^1\text{H}$ -NMR spectrum of 2-iodo -N-(4-bromophenylthiazol-2-yl)acetamide (**6e**).

**Fig. S45.**  $^{13}\text{C}$ -NMR spectrum of 2-iodo -N-(4-bromophenylthiazol-2-yl)acetamide (**6e**).

**Fig. S46.**  $^1\text{H}$ -NMR spectrum of 2-iodo-N-(benzo[*d*]thiazol-2-yl)acetamide (**6f**).

**Fig. S47.**  $^{13}\text{C}$ -NMR spectrum of 2-iodo-N-(benzo[*d*]thiazol-2-yl)acetamide (**6f**).

**Fig. S48.**  $^1\text{H}$ -NMR spectrum of (Z)-2-(5-(3,4,5-trimethoxybenzylidene)thiazolidine-2,4-dion-3-yl)-N-(thiazole-2-yl)acetamide (**7a**).

**Fig. S49.**  $^{13}\text{C}$ -NMR spectrum of (Z)-2-(5-(3,4,5-trimethoxybenzylidene)thiazolidine-2,4-dion-3-yl)-N-(thiazole-2-yl)acetamide (**7a**).

**Fig. S50.**  $^1\text{H}$ -NMR spectrum of (Z)-2-(5-(3,4,5-trimethoxybenzylidene)thiazolidine-2,4-dion-3-yl)-N-(4-phenylthiazole-2-yl)acetamide (**7b**).

**Fig. S51.**  $^{13}\text{C}$ -NMR spectrum of (Z)-2-(5-(3,4,5-trimethoxybenzylidene)thiazolidine-2,4-dion-3-yl)-N-(4-phenylthiazole-2-yl)acetamide (**7b**).

**Fig. S52.**  $^1\text{H}$ -NMR spectrum of (Z)-2-(5-(3,4,5-trimethoxybenzylidene)thiazolidin-2,4-dion-3-yl)-N-(4-(4-methylphenyl)thiazol-2-yl)acetamide (**7c**).

**Fig. S53.**  $^{13}\text{C}$ -NMR spectrum of (Z)-2-(5-(3,4,5-trimethoxybenzylidene)thiazolidin-2,4-dion-3-yl)-N-(4-(4-methylphenyl)thiazol-2-yl)acetamide (**7c**).

**Fig. S54.**  $^1\text{H}$ -NMR spectrum of (Z)-2-(5-(3,4,5-trimethoxybenzylidene)thiazolidin-2,4-dion-3-yl)-N-(4-(4-chlorophenyl)thiazol-2-yl)acetamide (**7d**).

**Fig. S55.**  $^{13}\text{C}$ -NMR spectrum of (Z)-2-(5-(3,4,5-trimethoxybenzylidene)thiazolidin-2,4-dion-3-yl)-N-(4-(4-chlorophenyl)thiazol-2-yl)acetamide (**7d**).

**Fig. S56.**  $^1\text{H}$ -NMR spectrum of (Z)-2-(5-(3,4,5-trimethoxybenzylidene)thiazolidin-2,4-dion-3-yl)-N-(4-(4-bromophenyl)thiazol-2-yl)acetamide (**7e**).

**Fig. S57.**  $^{13}\text{C}$ -NMR spectrum of (Z)-2-(5-(3,4,5-trimethoxybenzylidene)thiazolidin-2,4-dion-3-yl)-N-(4-(4-bromophenyl)thiazol-2-yl)acetamide (**7e**).

**Fig. S58.**  $^1\text{H}$ -NMR spectrum of (Z)-2-(5-(3,4,5-trimethoxybenzylidene)thiazolidin-2,4-dion-3-yl)-N-(benzo[*d*]thiazol-2-yl)acetamide (**7f**).

**3) 2D-schematic representation of ligand-protein interactions.** All the plots were calculated using LIGPLOT (Wallace A C, Laskowski R A & Thornton J M (1995). LIGPLOT: A program to generate schematic diagrams of protein-ligand interactions. *Prot. Eng.*, 8, 127-134.). Figures S59-S64 are relative to hTopo I; Figures S65-S70 are relative to hTopo II.

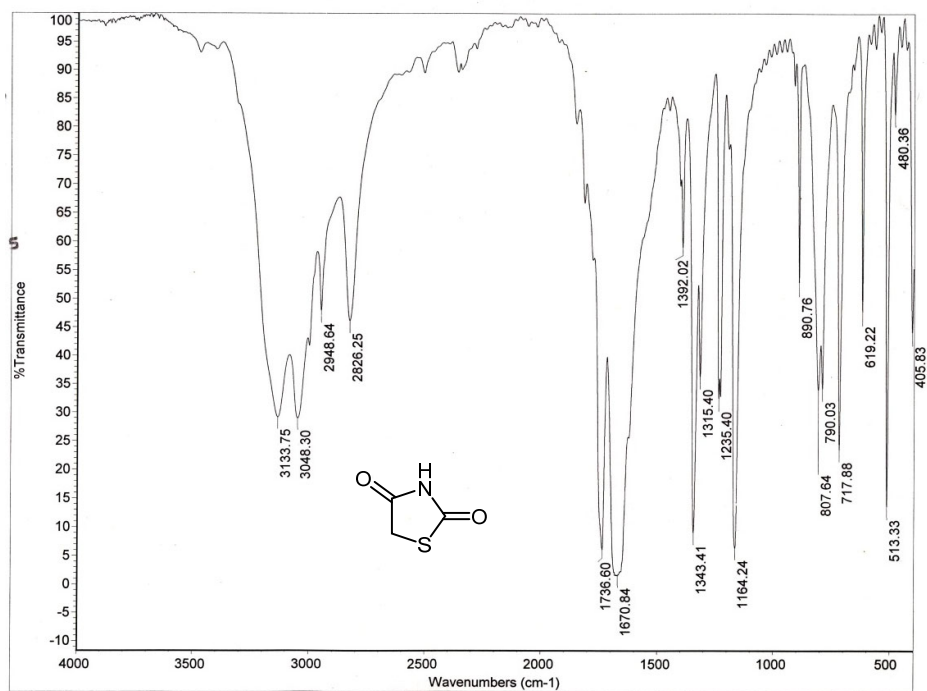

Fig. S1. IR spectrum of 1,3-thiazolidine-2,4-dione (1).

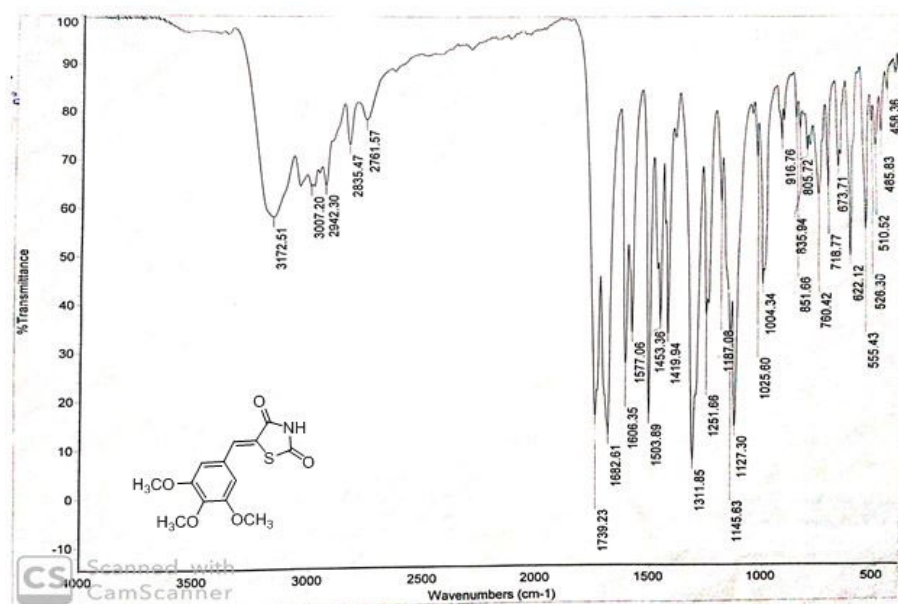

Fig. S2. IR spectrum of (Z)-5-(3,4,5-Trimethoxybenzylidene)thiazolidine-2,4-dione (2).

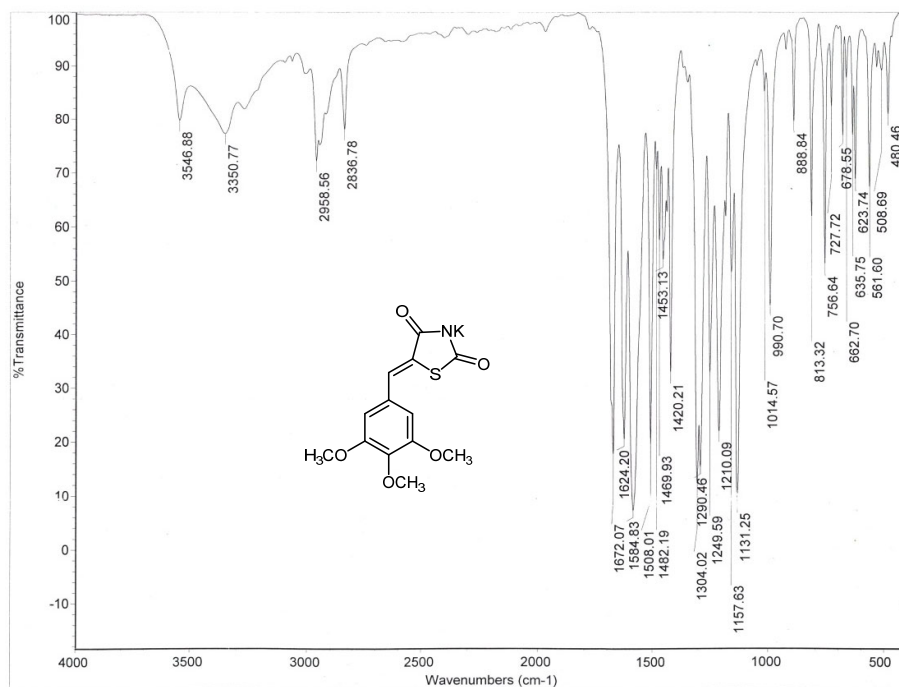

**Fig. S3.** IR spectrum of potassium (Z)-5-(3,4,5-Trimethoxybenzylidene)thiazolidine-2,4-dione-3-ide (**3**).

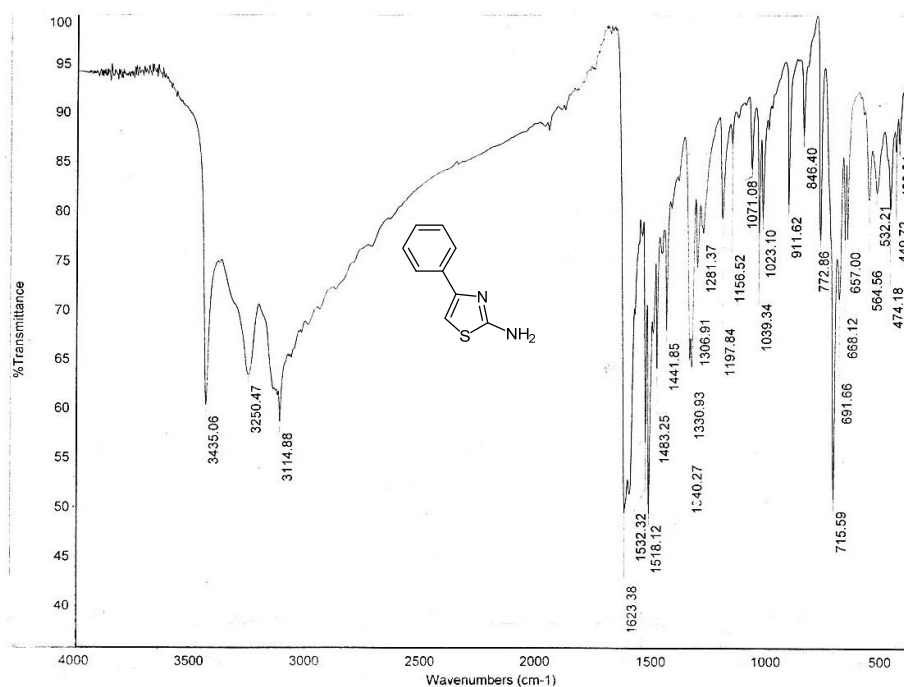

**Fig. S4.** IR spectrum of 2-amino-4-phenylthiazole (**4b**).

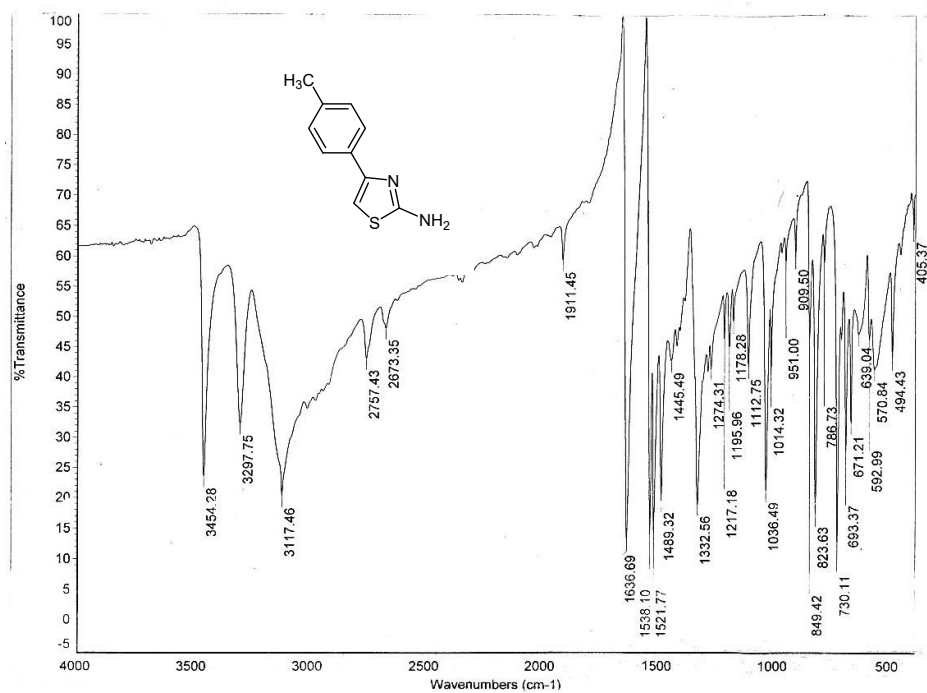

**Fig. S5.** IR spectrum of 2-amino-4-(4-methylphenyl)thiazole (4c).

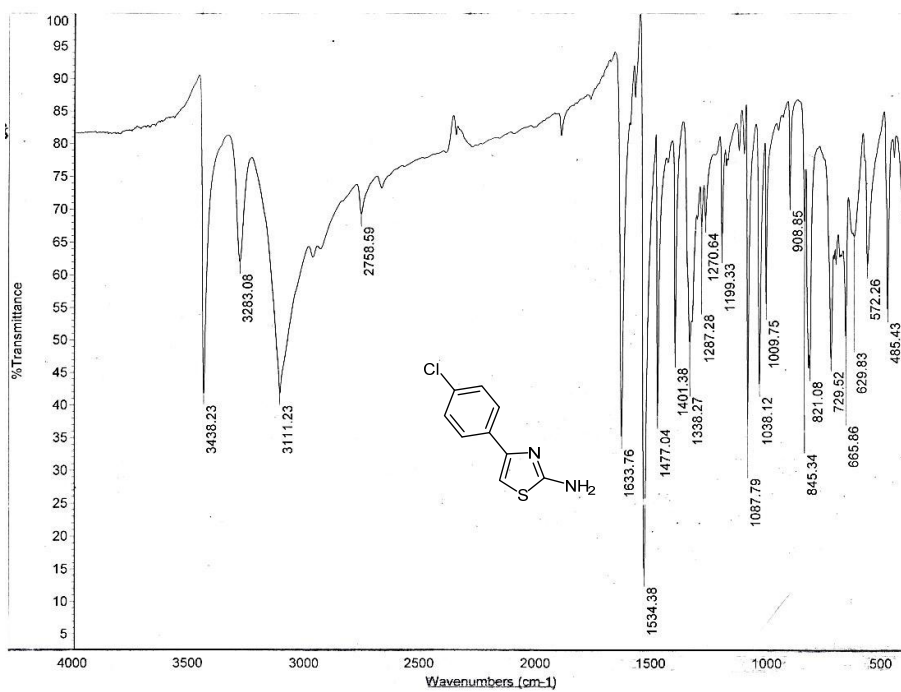

**Fig. S6.** IR spectrum of 2-amino-4-(4-chlorophenyl)thiazole (4d).

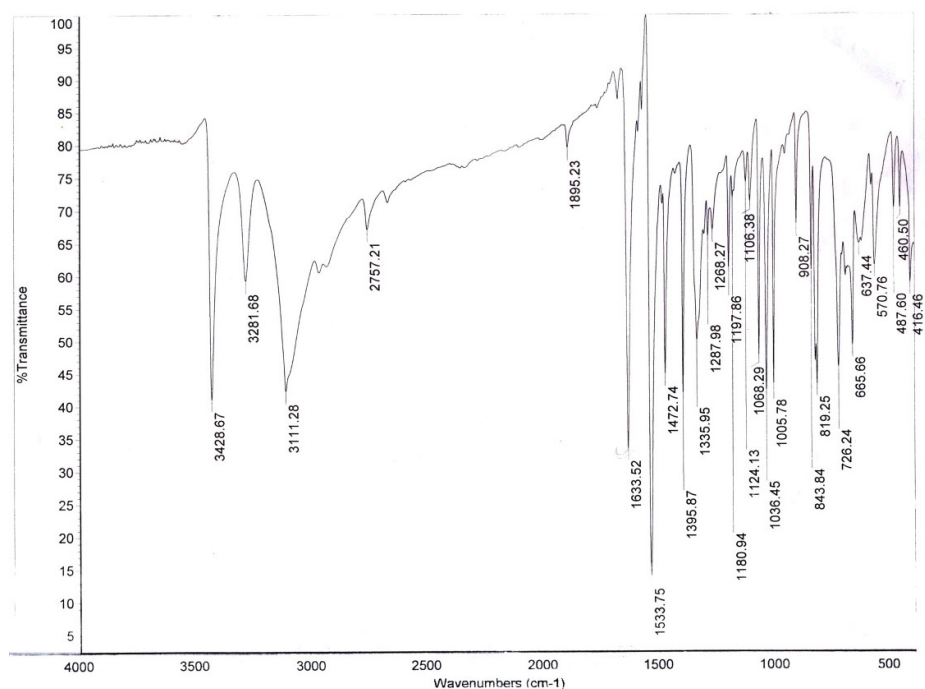

**Fig. S7.** IR spectrum of 2-amino-4-(4-bromophenyl)thiazole (**4e**).

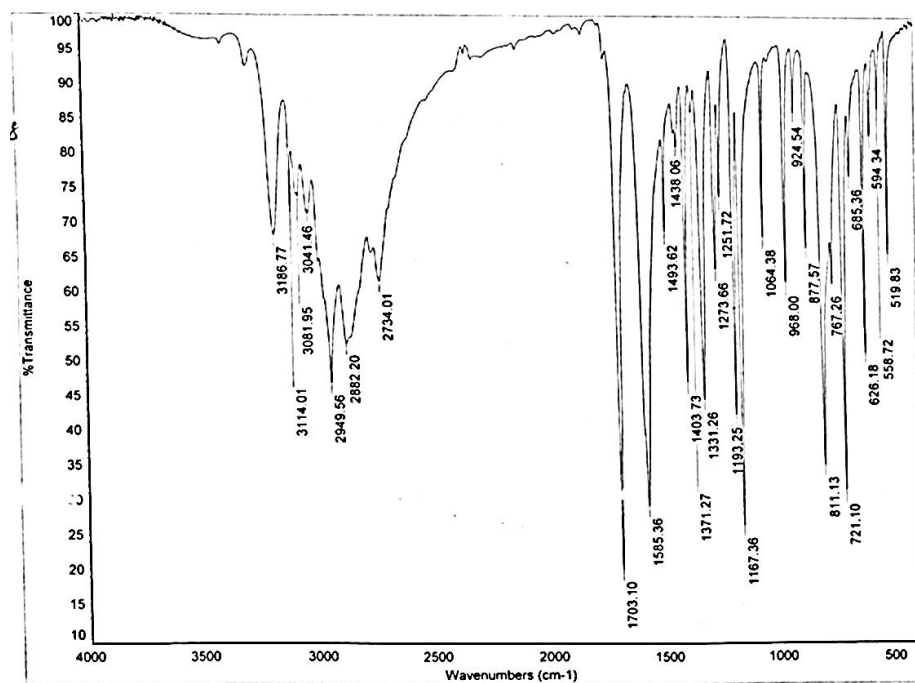

**Fig. S8.** IR spectrum of 2-chloro-N-(thiazol-2-yl)acetamide (**5a**).

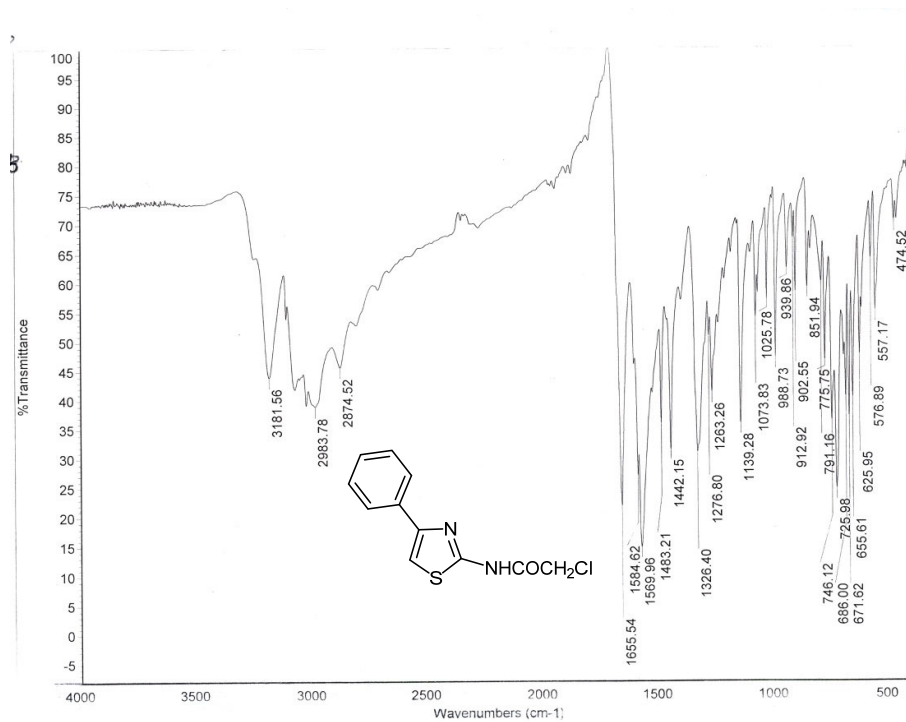

**Fig. S9.** IR spectrum of 2-chloro-N-(4-phenylthiazol-2-yl)acetamide (**5b**).

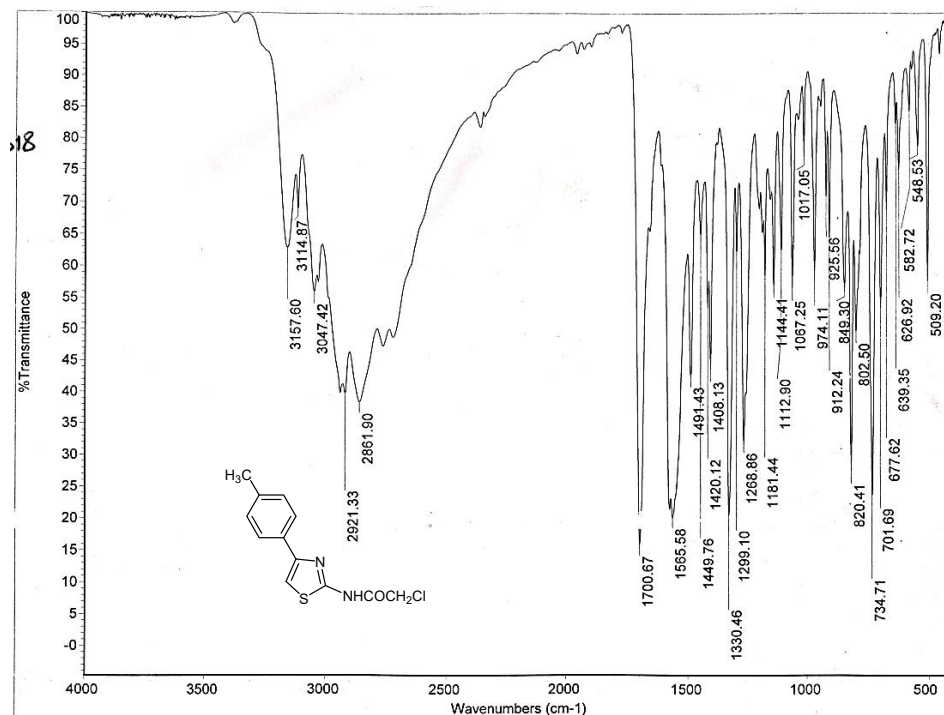

**Fig. S10.** IR spectrum of 2-chloro-N-(4-methylphenylthiazol-2-yl)acetamide (**5c**).



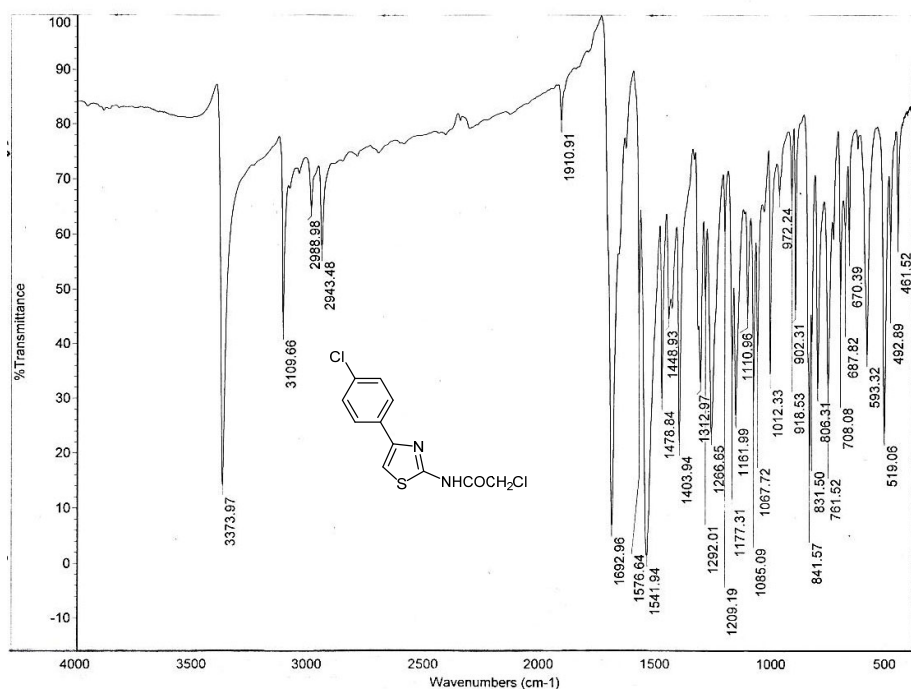

**Fig. S11.** IR spectrum of 2-chloro-N-(4-chlorophenylthiazol-2-yl)acetamide (**5d**).

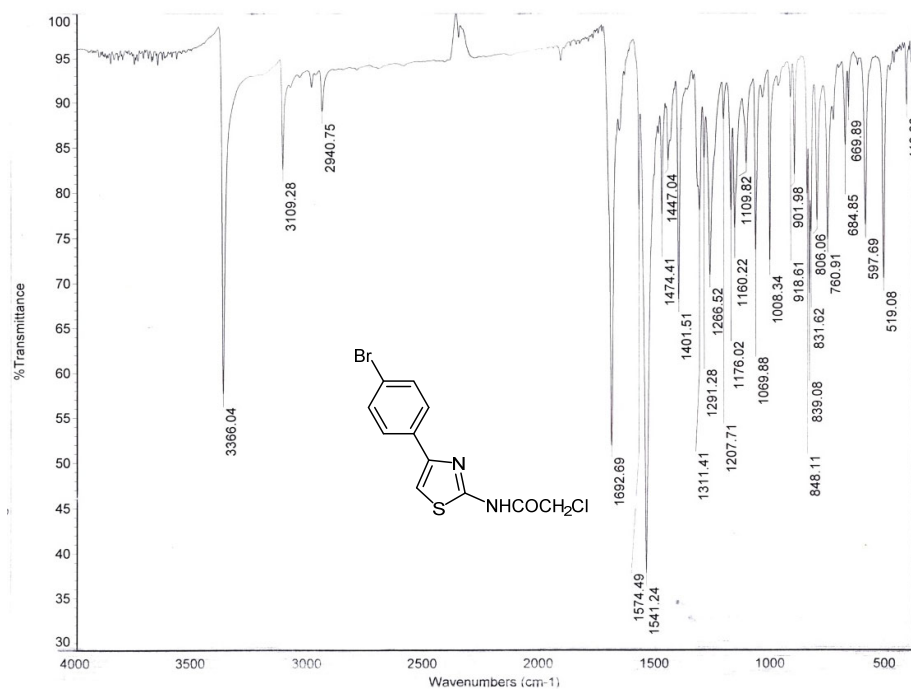

**Fig. S12.** IR spectrum of 2-chloro-N-(4-bromophenylthiazol-2-yl)acetamide (**5e**).

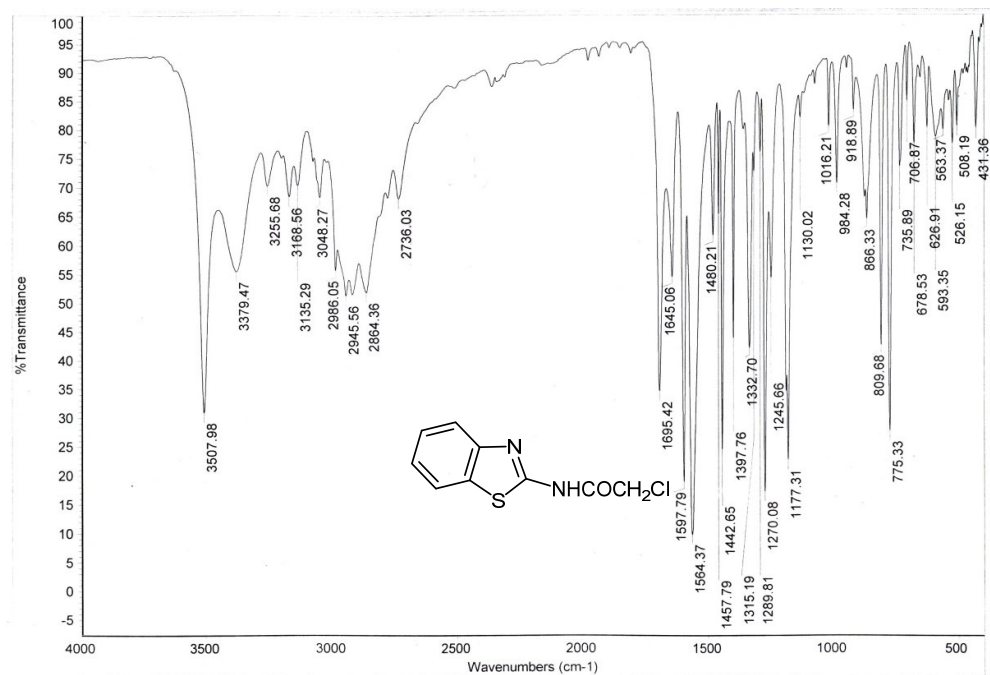

Fig. S13. IR spectrum of 2-chloro-N-(benzo[d] thiazol-2-yl)acetamide (5f).

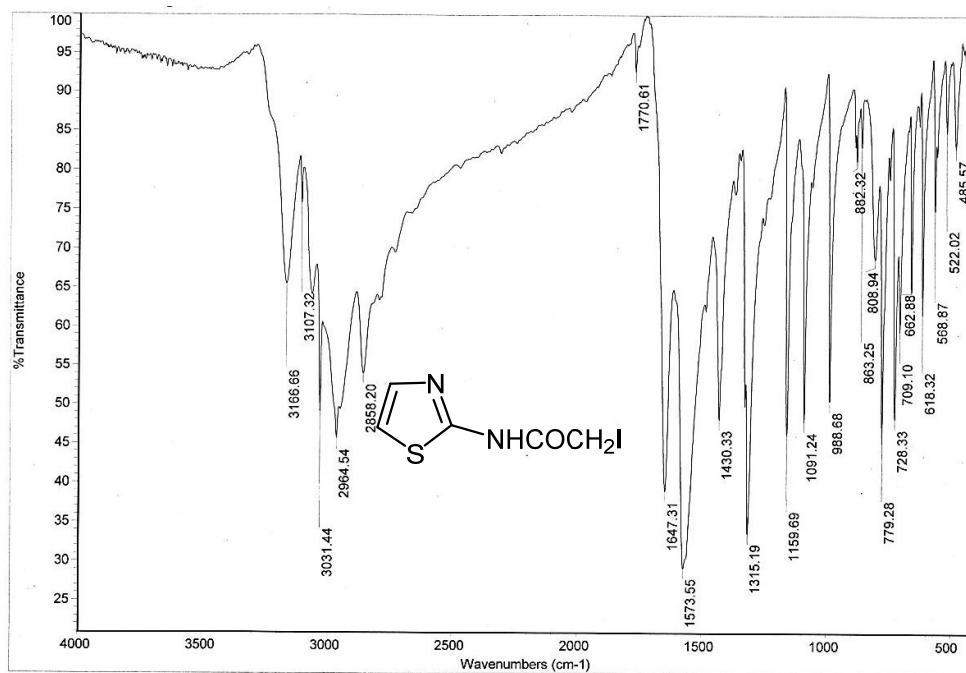

Fig. S14. IR spectrum of 2-iodo-N-(thiazol-2-yl)acetamide (6a).

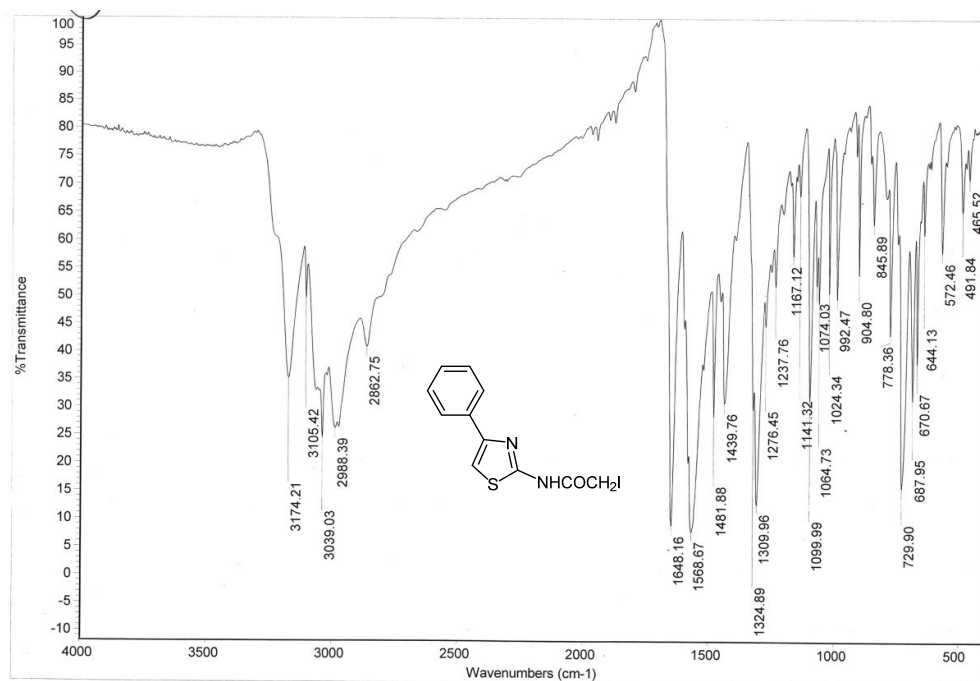

**Fig. S15.** IR spectrum of 2-iodo-N-(4-phenylthiazol-2-yl)acetamide (**6b**).

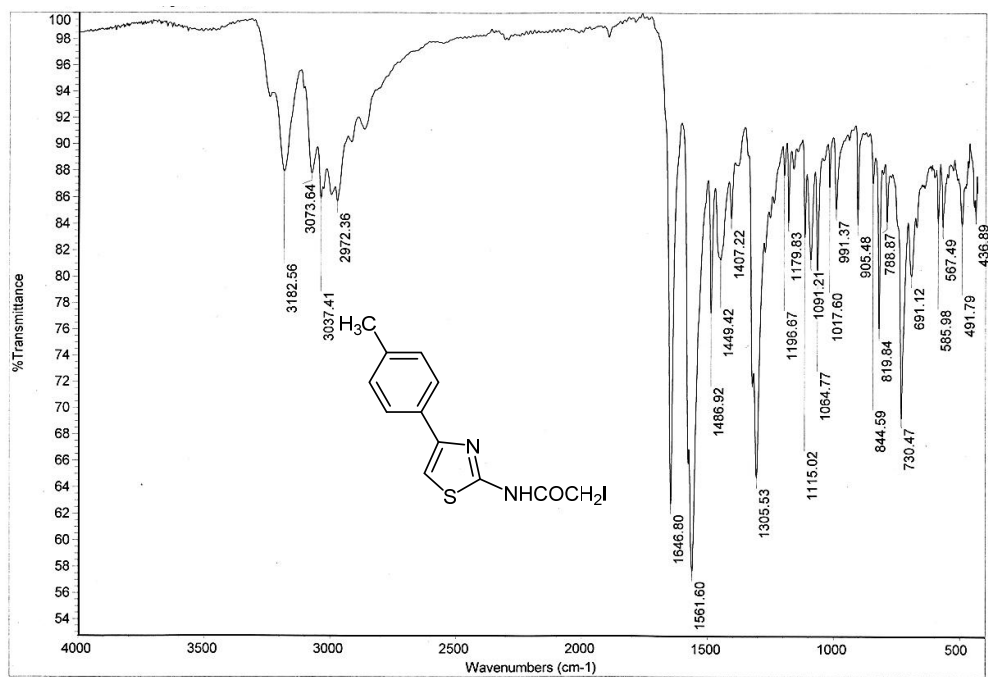

**Fig. S16.** IR spectrum of 2-iodo-N-(4-methylphenylthiazol-2-yl)acetamide (**6c**).

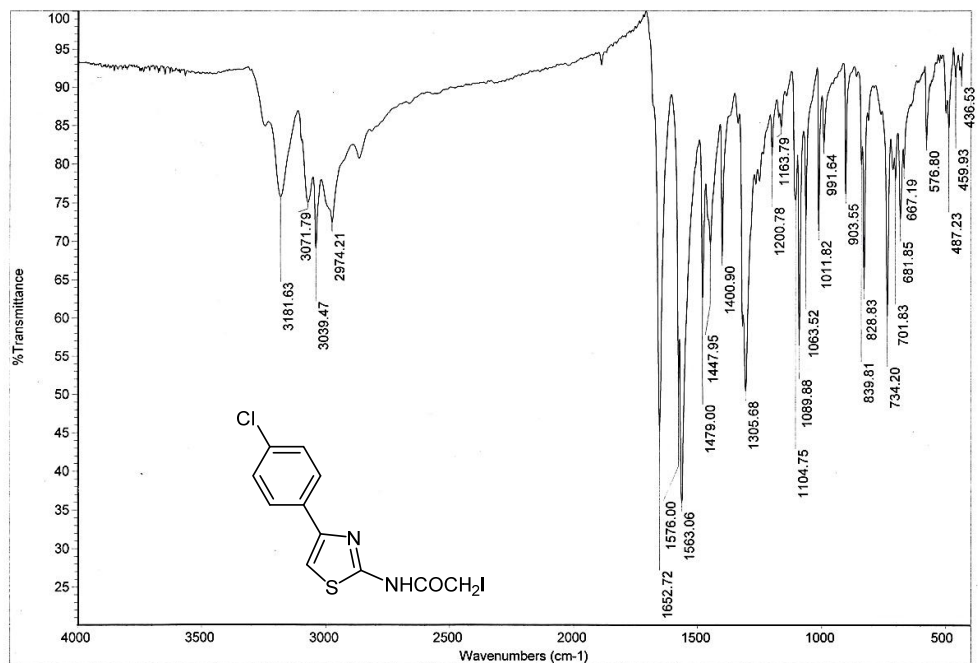

**Fig. S17.** IR spectrum of 2-iodo-N-(4-chlorophenylthiazol-2-yl)acetamide (**6d**).

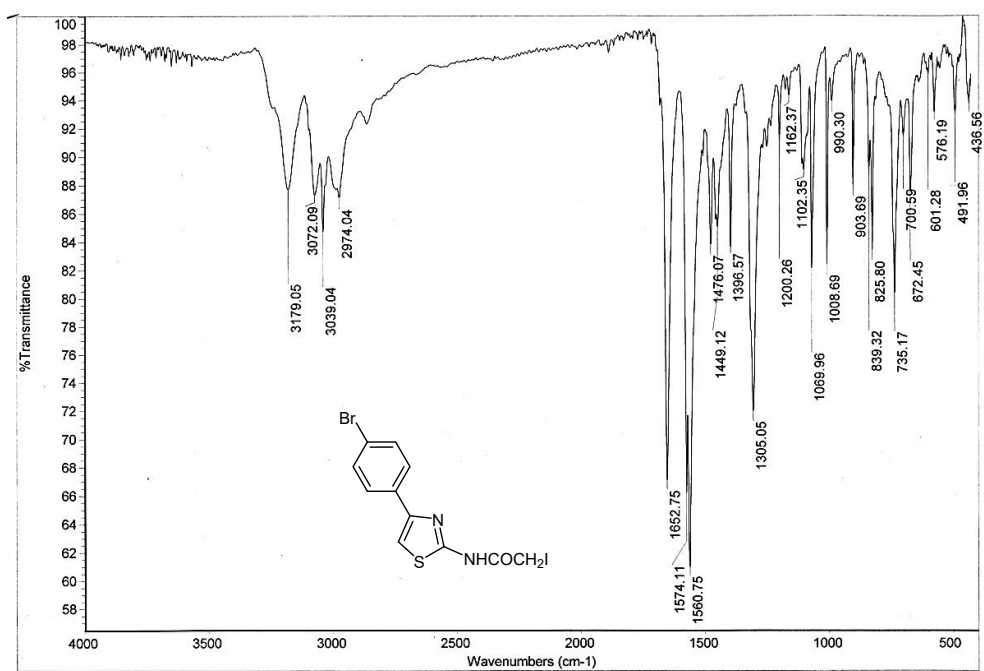

**Fig. S18.** IR spectrum of 2-iodo-N-(4-bromophenylthiazol-2-yl)acetamide (**6e**).

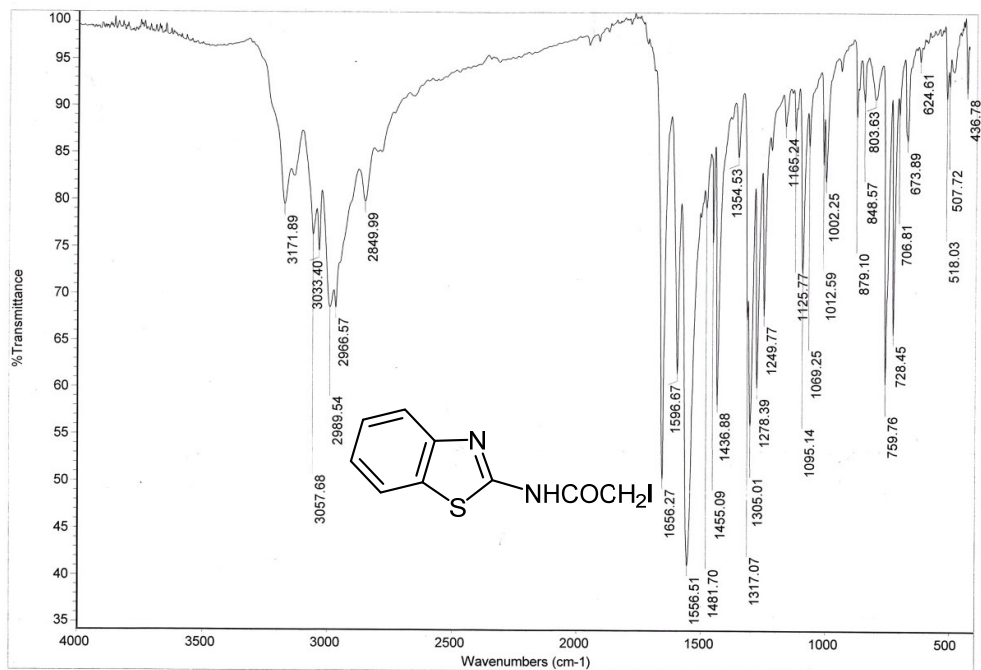

**Fig. S19.** IR spectrum of 2-iodo-N-(benzo[d]thiazol-2-yl)acetamide (6f).

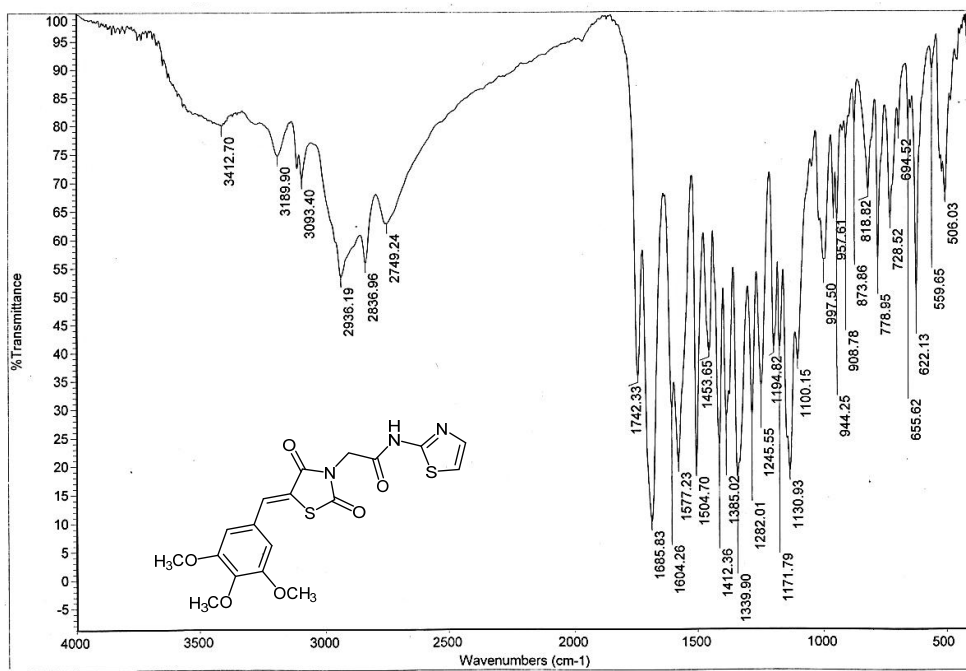

**Fig. S20.** IR spectrum of (Z)-2-(5-(3,4,5-trimethoxybenzylidene)thiazolidin-2,4-dion-3-yl)-N-(thiazol-2-yl)acetamide (7a).

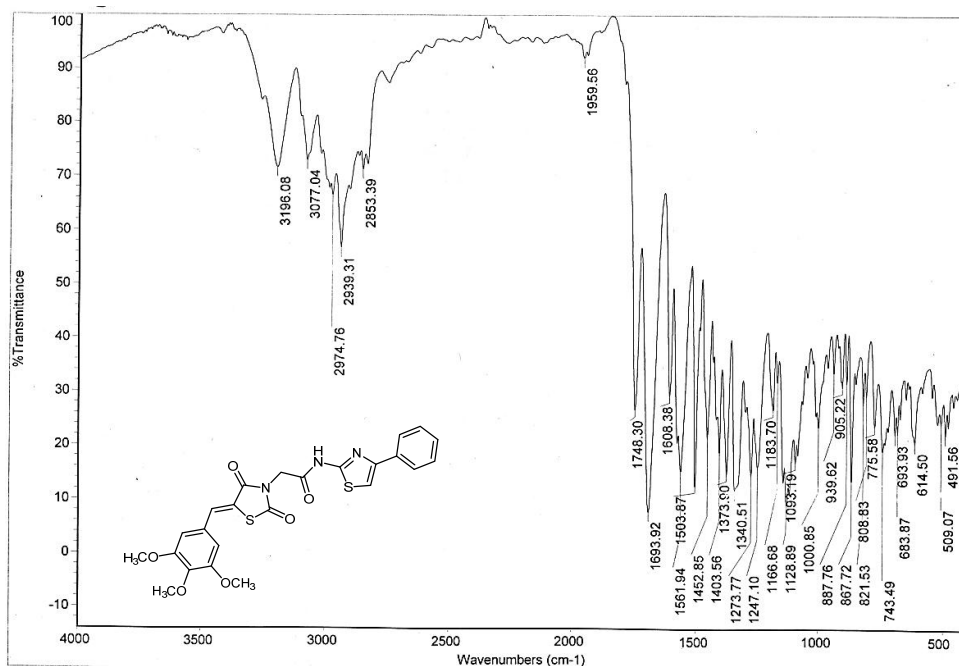

**Fig. S21.** IR spectrum of (Z)-2-(5-(3,4,5-trimethoxybenzylidene)thiazolidine-2,4-dion-3-yl)-N-(4-phenylthiazole-2-yl)acetamide (7b).

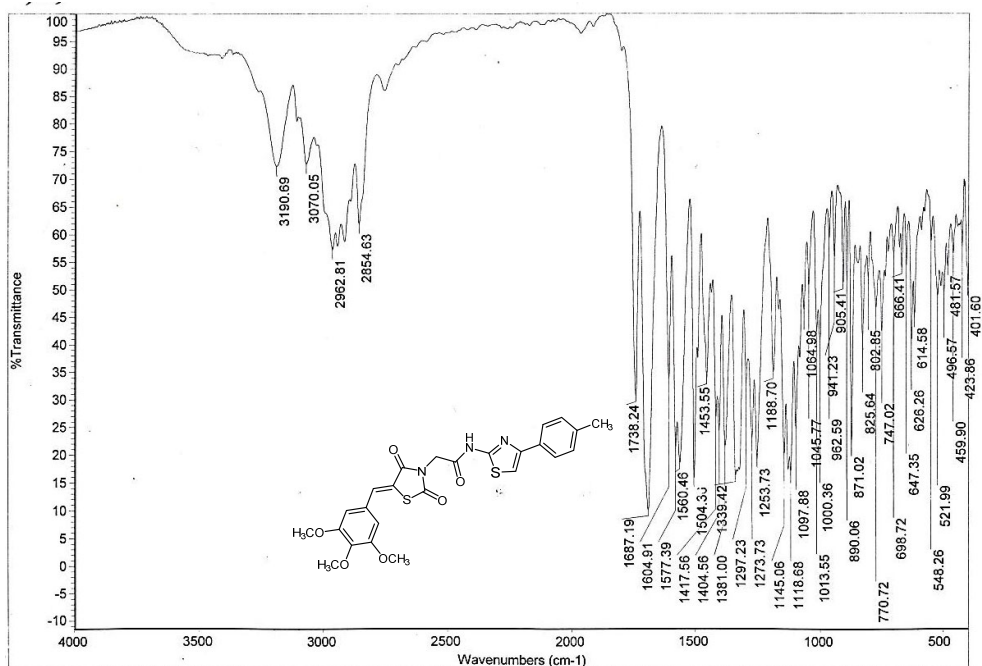

**Fig. S22.** IR spectrum of (Z)-2-(5-(3,4,5-trimethoxybenzylidene)thiazolidine-2,4-dion-3-yl)-N-(4-(4-methylphenyl)thiazol-2-yl)acetamide (7c).

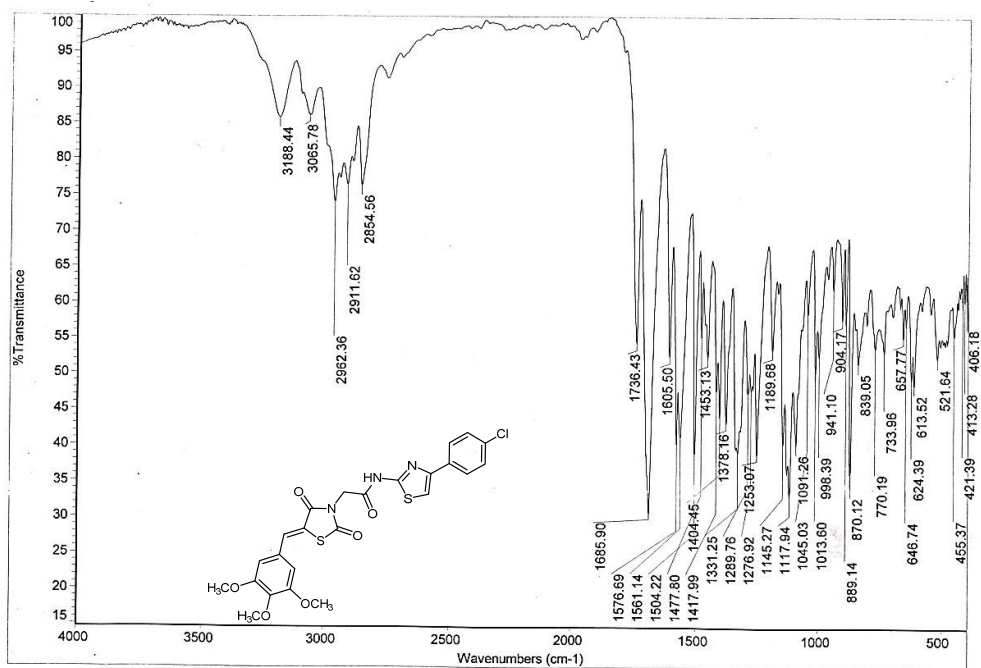

**Fig. S23.** IR spectrum of (Z)-2-(5-(3,4,5-trimethoxybenzylidene)thiazolidin-2,4-dion-3-yl)-N-(4-(4-chlorophenyl)thiazol-2-yl)acetamide (**7d**).

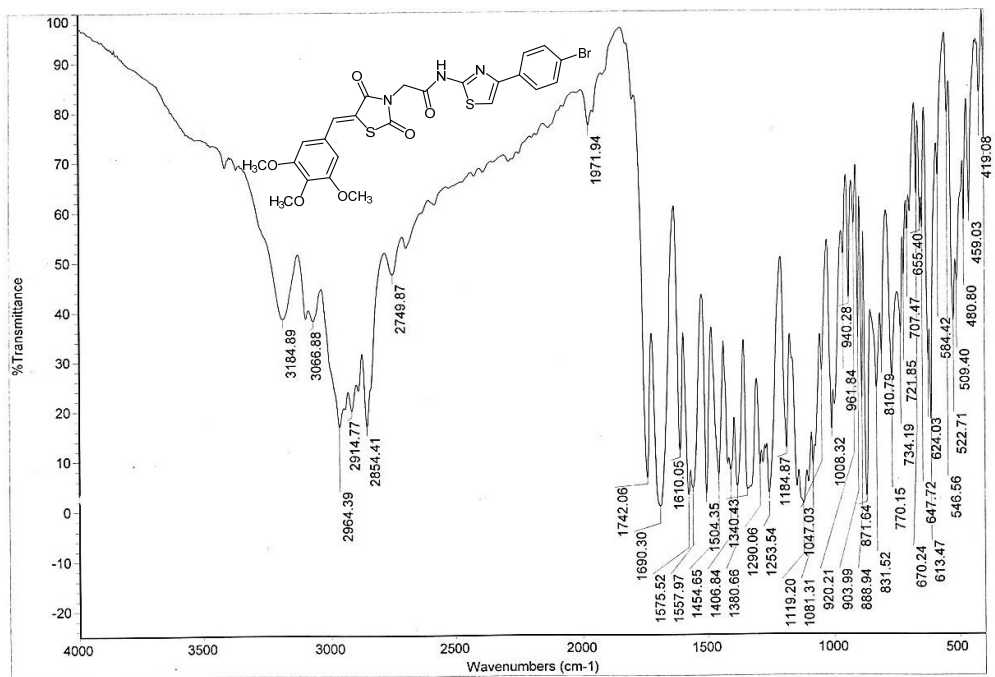

**Fig. S24.** IR spectrum of (Z)-2-(5-(3,4,5-trimethoxybenzylidene)thiazolidin-2,4-dion-3-yl)-N-(4-(4-bromophenyl)thiazol-2-yl)acetamide (**7e**).



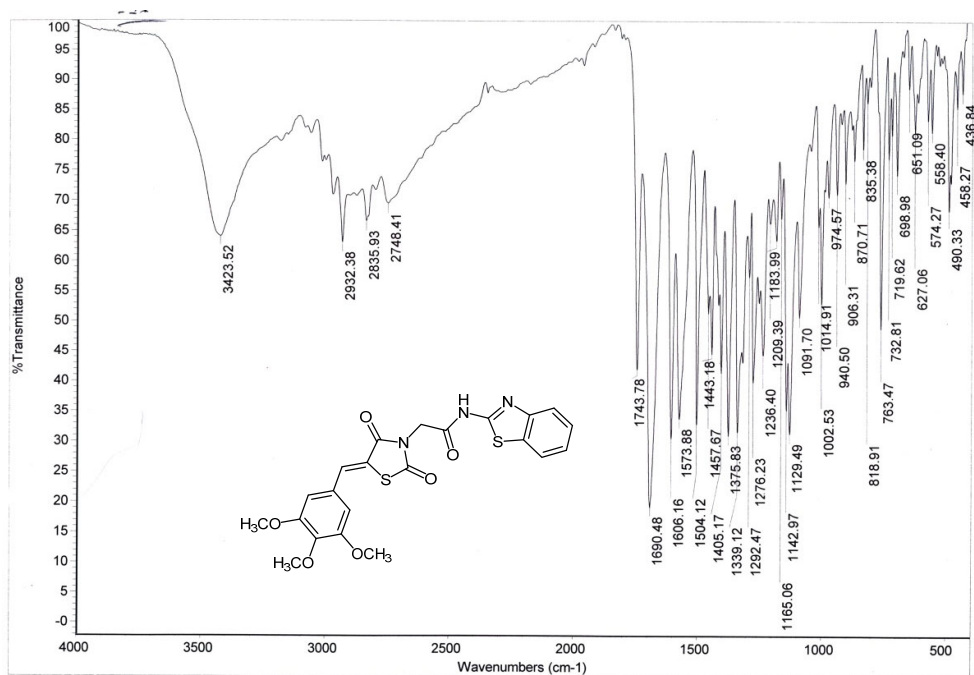

**Fig. S25.** IR spectrum of (Z)-2-(5-(3,4,5-trimethoxybenzylidene)thiazolidin-2,4-dion-3-yl)-N-(benzo[d]thiazol-2-yl)acetamide (**7e**).

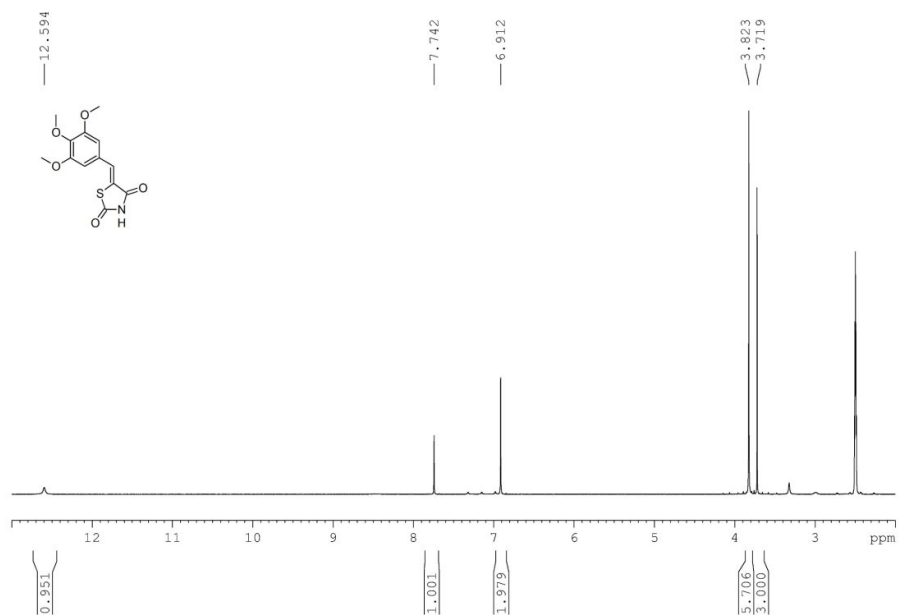

**Fig. S26.** <sup>1</sup>H-NMR spectrum of (Z)-5-(3,4,5-Trimethoxybenzylidene) thiazolidine-2,4-dione (**2**).



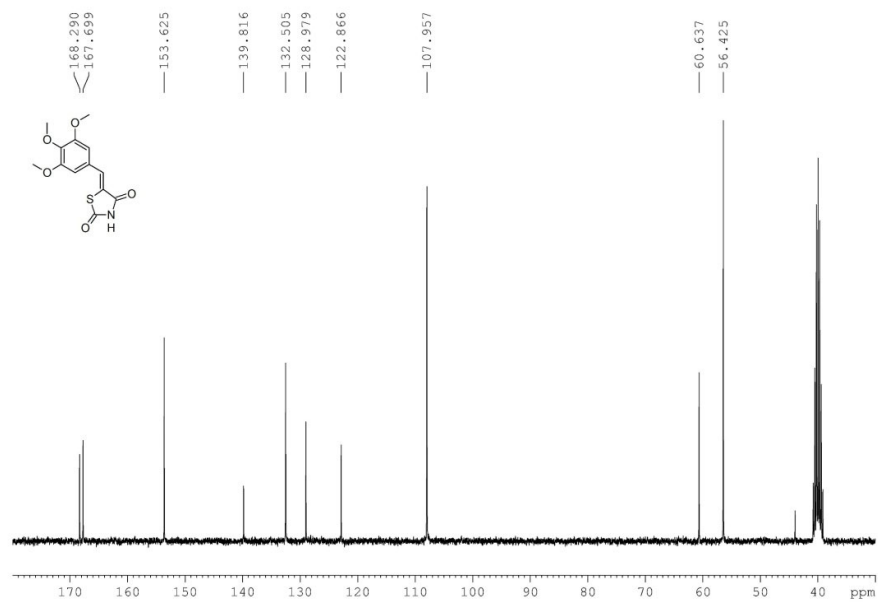

**Fig. S27.** <sup>13</sup>C-NMR spectrum of (Z)-5-(3,4,5-Trimethoxybenzylidene) thiazolidine-2,4-dione (**2**).

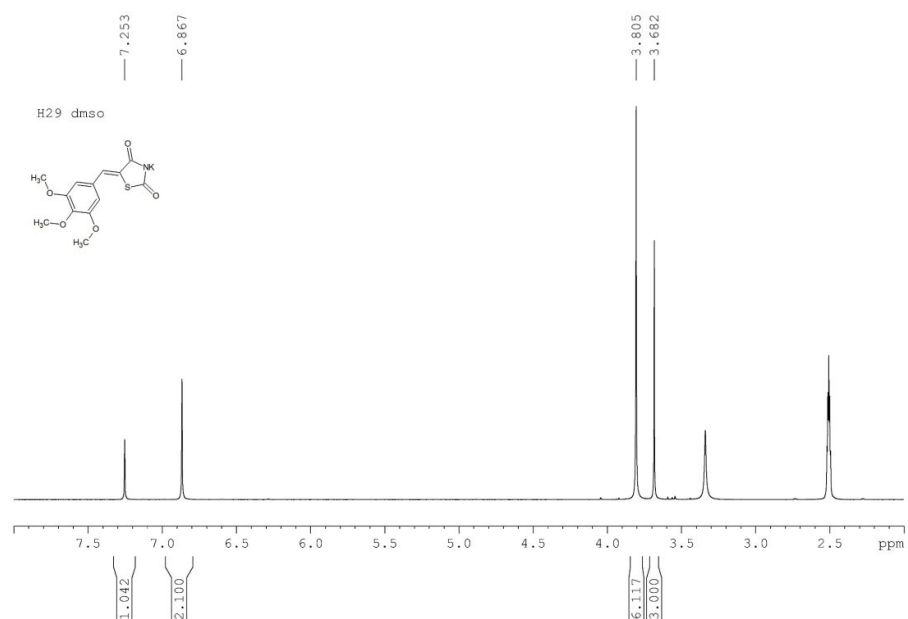

**Fig. S28.** <sup>1</sup>H-NMR spectrum of potassium (Z)-5-(3,4,5-Trimethoxybenzylidene)thiazolidine-2,4-dione-3-ide (**3**).

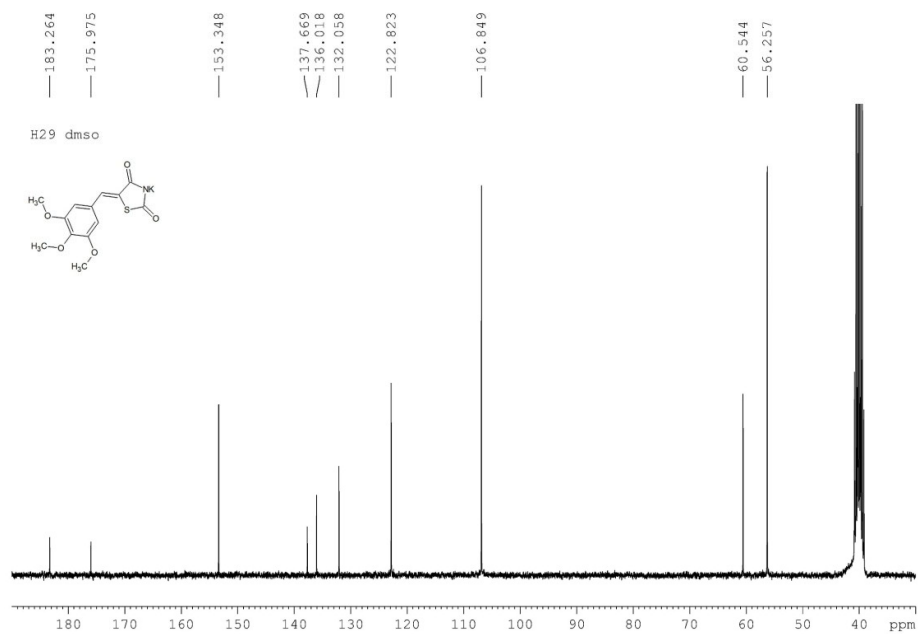

**Fig. S29.** <sup>13</sup>C-NMR spectrum of potassium (Z)-5-(3,4,5-Trimethoxybenzylidene)thiazolidine-2,4-dione-3-ide (3).

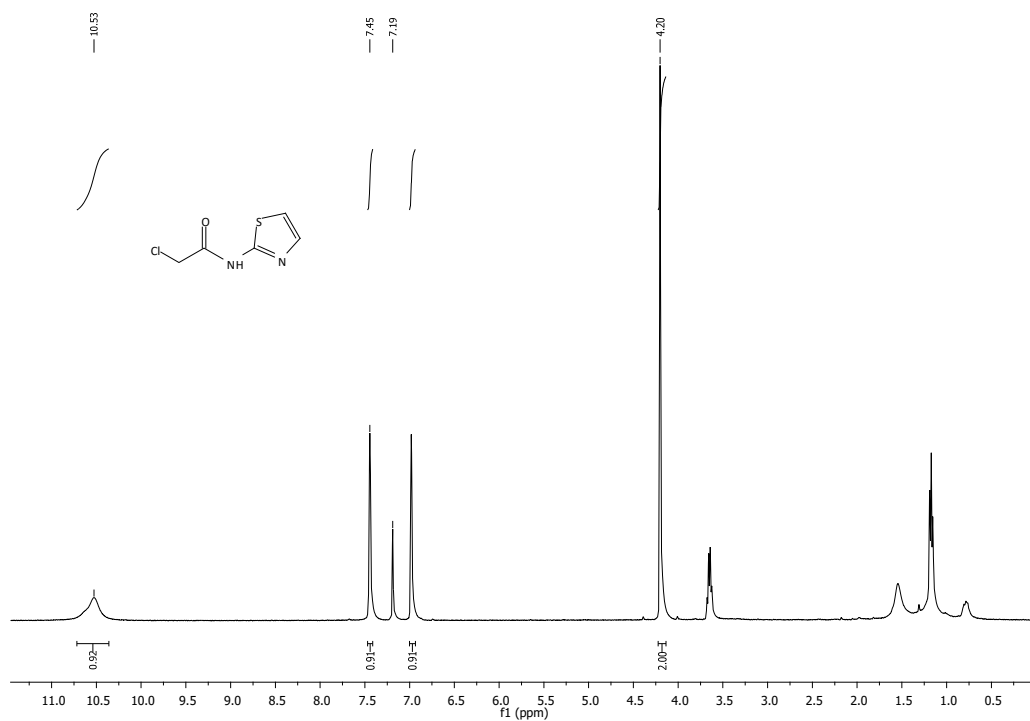

**Fig. S30.** <sup>1</sup>H-NMR spectrum of 2-chloro-N-(thiazol-2-yl)acetamide (5a). CDCl<sub>3</sub>

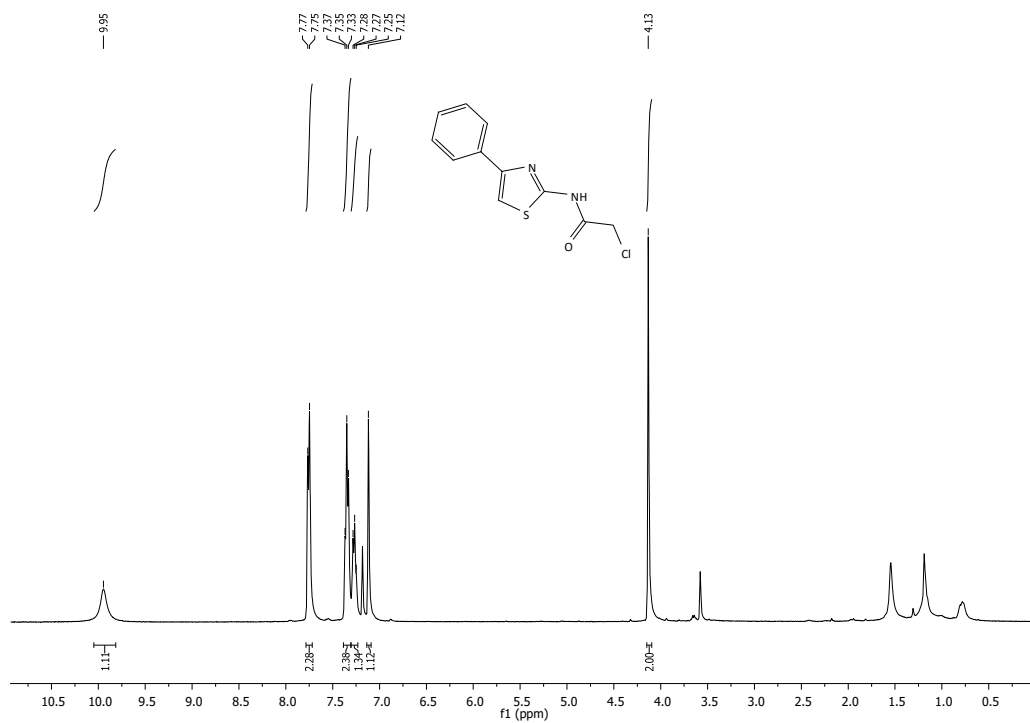

**Fig. S31.** <sup>1</sup>H-NMR spectrum of 2-chloro-N-(4-phenylthiazol-2-yl)acetamide (**5b**).

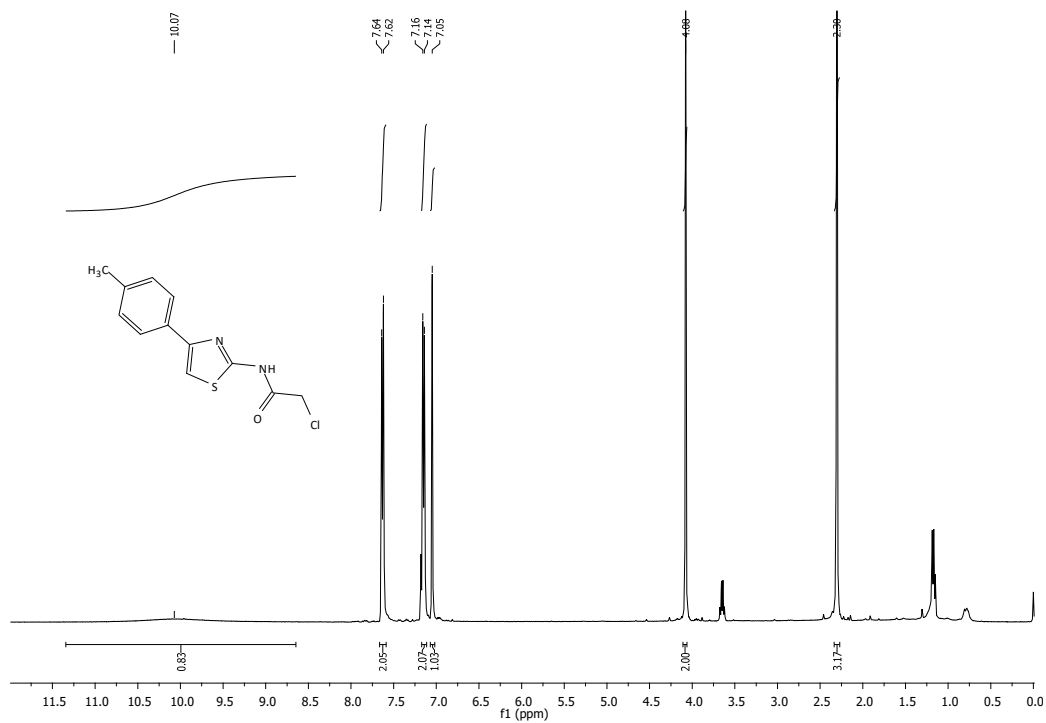

**Fig. S32.** <sup>1</sup>H-NMR spectrum (CDCl<sub>3</sub>) of 2-chloro-N-(4-methylphenylthiazol-2-yl)acetamide (**5c**).

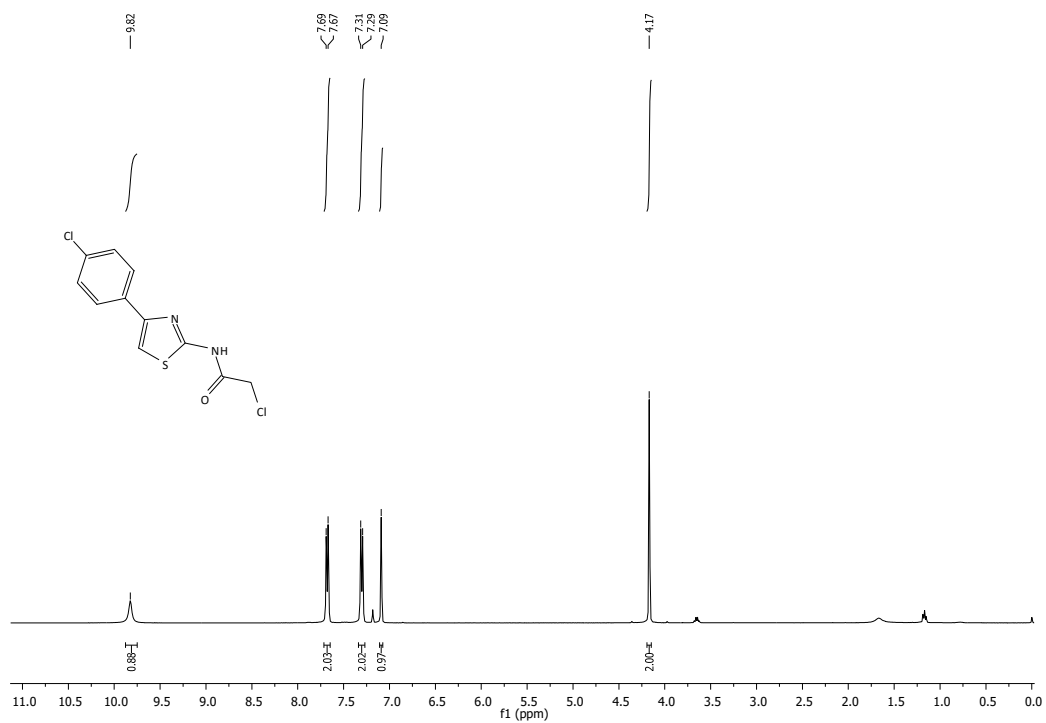

**Fig.S33.** <sup>1</sup>H-NMR spectrum (CDCl<sub>3</sub>) of 2-chloro-N-(4-chlorophenylthiazol-2-yl)acetamide (5d).

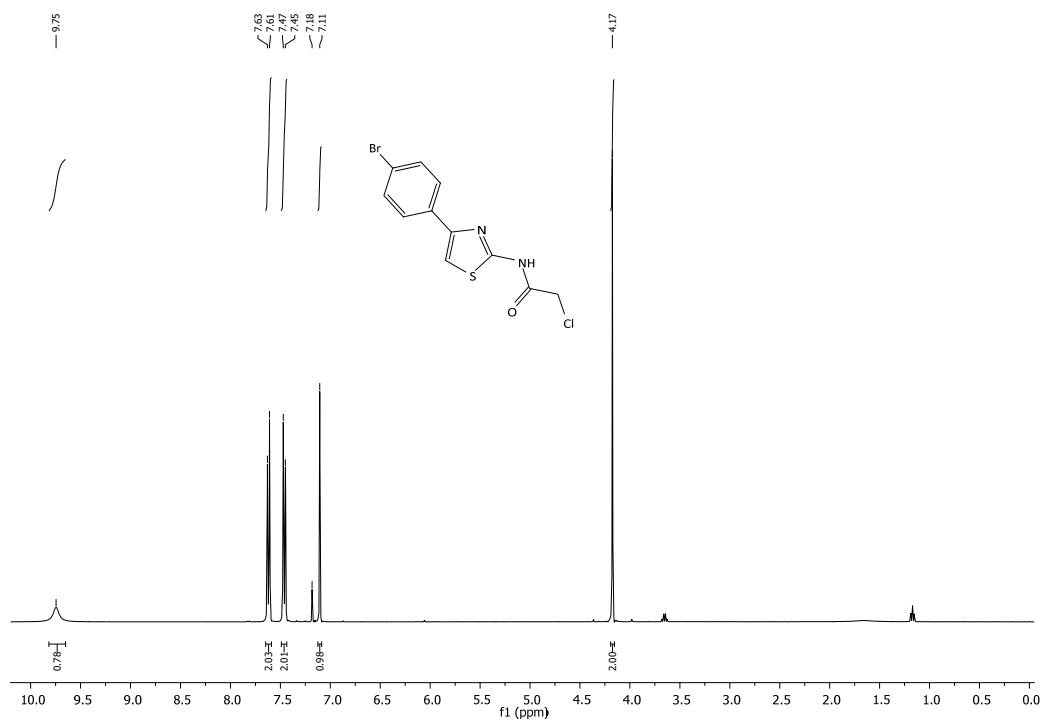

**Fig. S34.** <sup>1</sup>H-NMR spectrum (CDCl<sub>3</sub>) of 2-chloro-N-(4-bromophenylthiazol-2-yl)acetamide (5e).

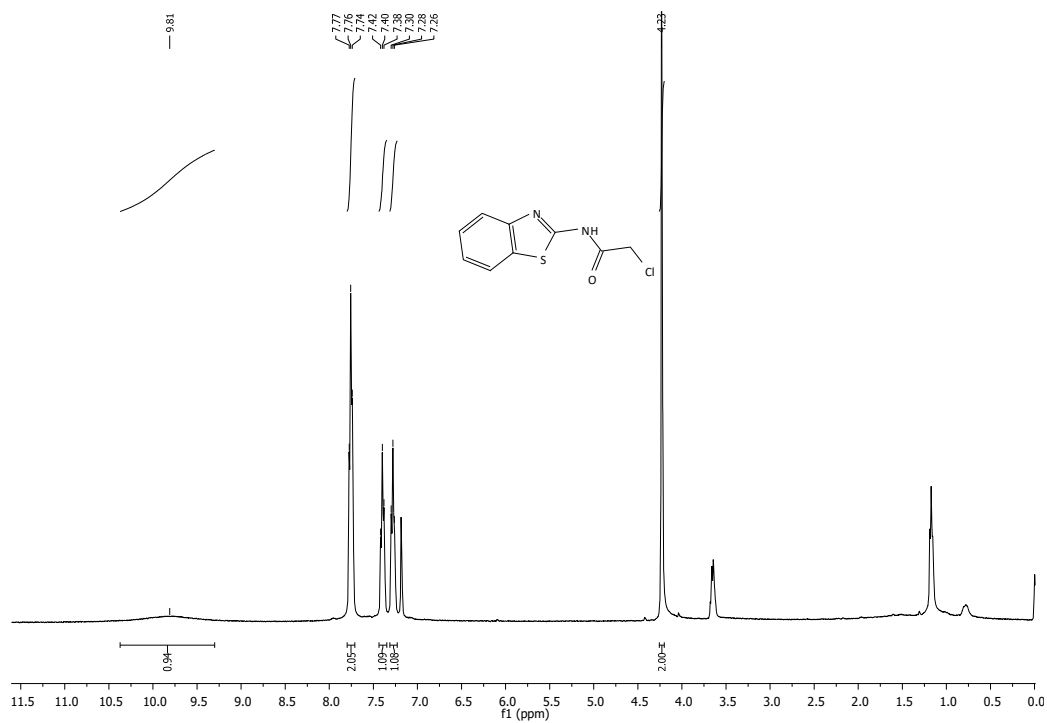

**Fig. S35.** <sup>1</sup>H-NMR spectrum (CDCl<sub>3</sub>) of 2-chloro-N-(benzo[d]thiazol-2-yl)acetamide (5f).

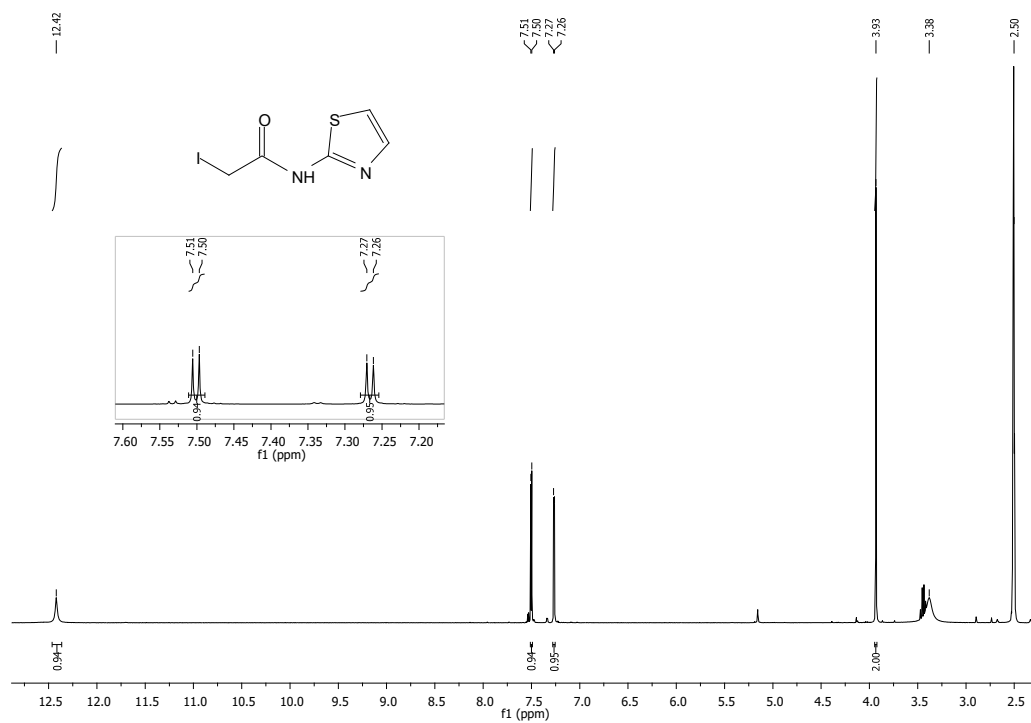

**Fig. S36.** <sup>1</sup>H-NMR spectrum of 2-iodo-N-(thiazol-2-yl)acetamide (6a).

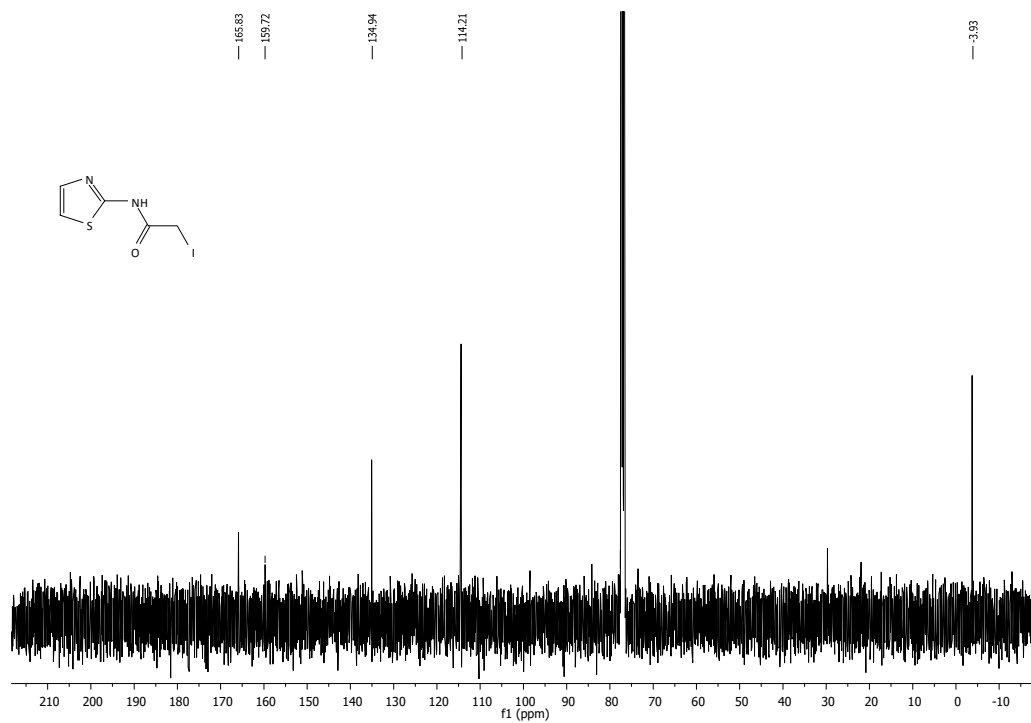

**Fig. S37.**  $^{13}\text{C}$ -NMR spectrum (CDCl<sub>3</sub>) of 2-iodo-N-(thiazol-2-yl)acetamide (**6a**).

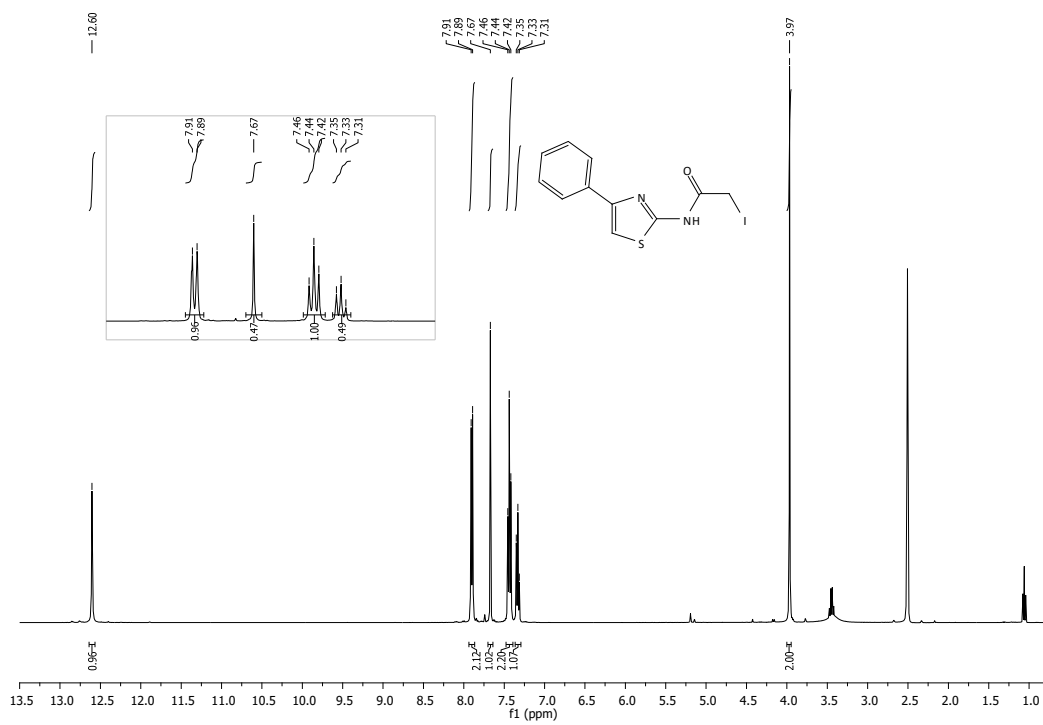

**Fig. S38.**  $^1\text{H}$ -NMR spectrum of 2-iodo-N-(4-phenylthiazol-2-yl)acetamide (**6b**).

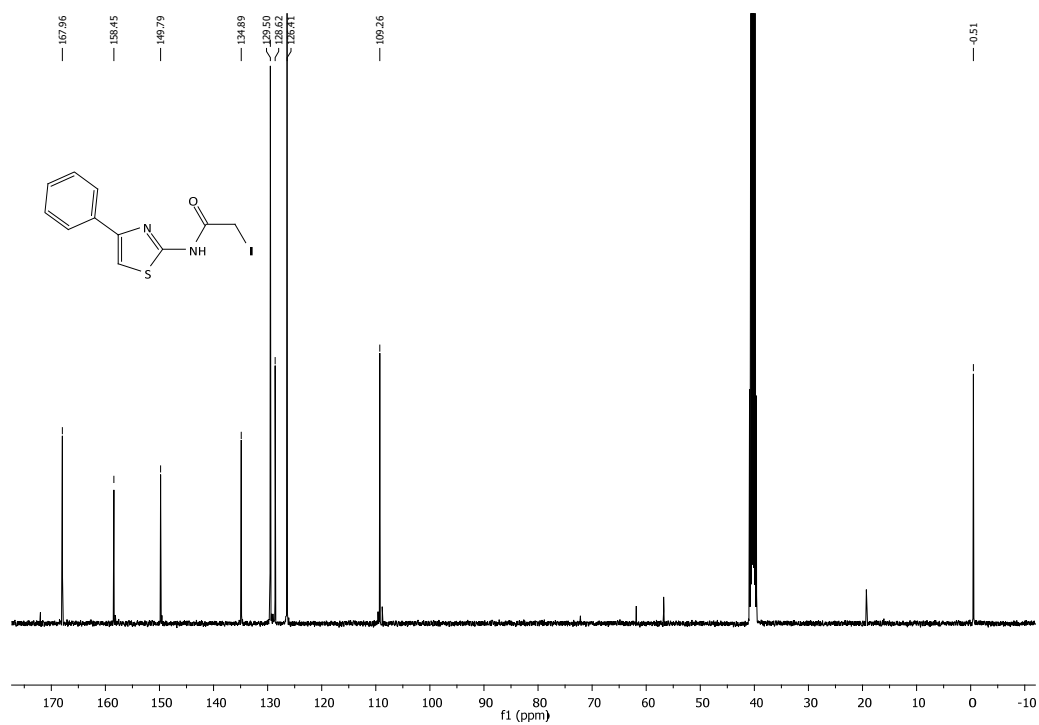

**Fig. S39.** <sup>13</sup>C-NMR spectrum of 2-iodo-N-(4-phenylthiazol-2-yl)acetamide (**6b**).

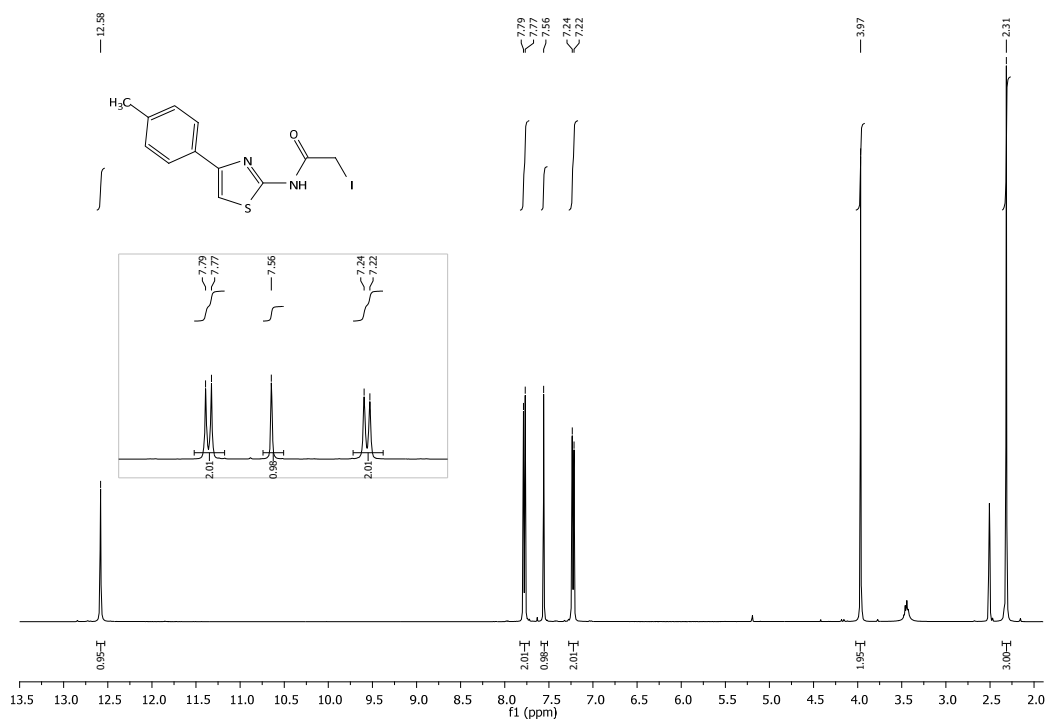

**Fig. S40.** <sup>1</sup>H-NMR spectrum of 2-iodo-N-(4-methylphenylthiazol-2-yl)acetamide (**6c**).

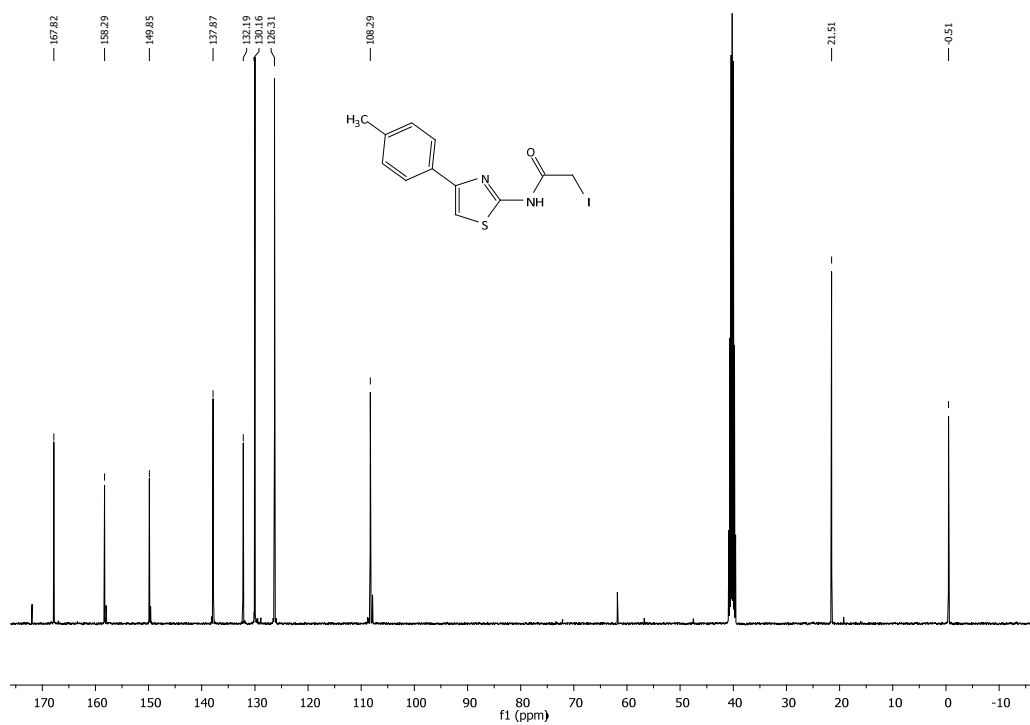

**Fig. S41.** <sup>13</sup>C-NMR spectrum of 2-iodo-N-(4-methyl phenylthiazol-2-yl)acetamide (**6c**).

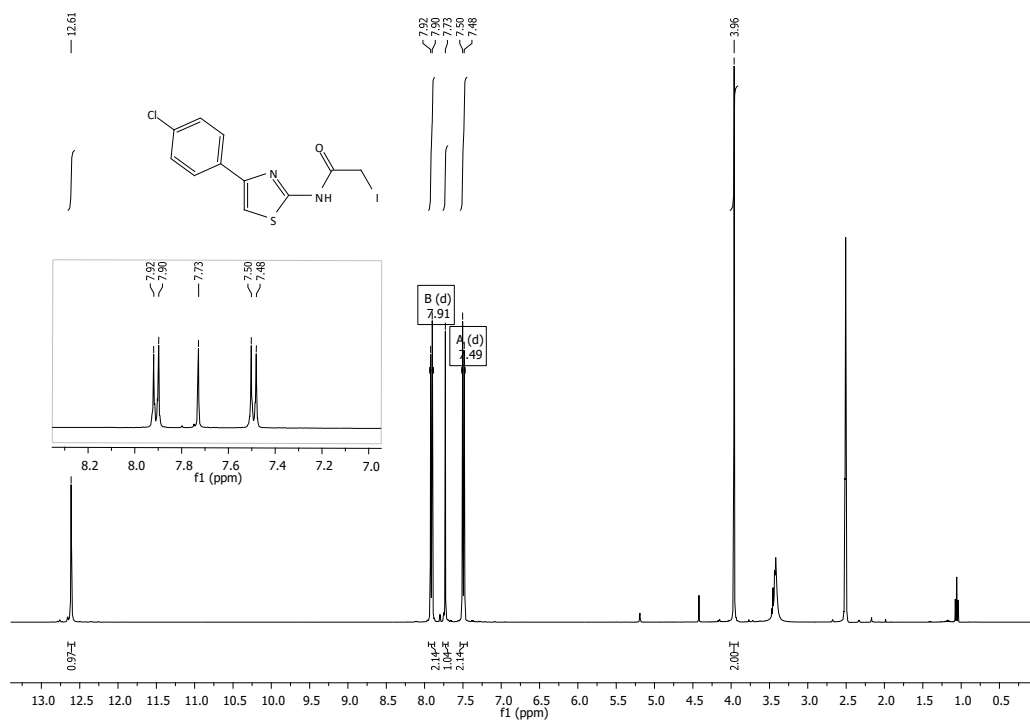

**Fig. S42.** <sup>1</sup>H-NMR spectrum of 2-iodo-N-(4-chlorophenylthiazol-2-yl)acetamide (**6d**).



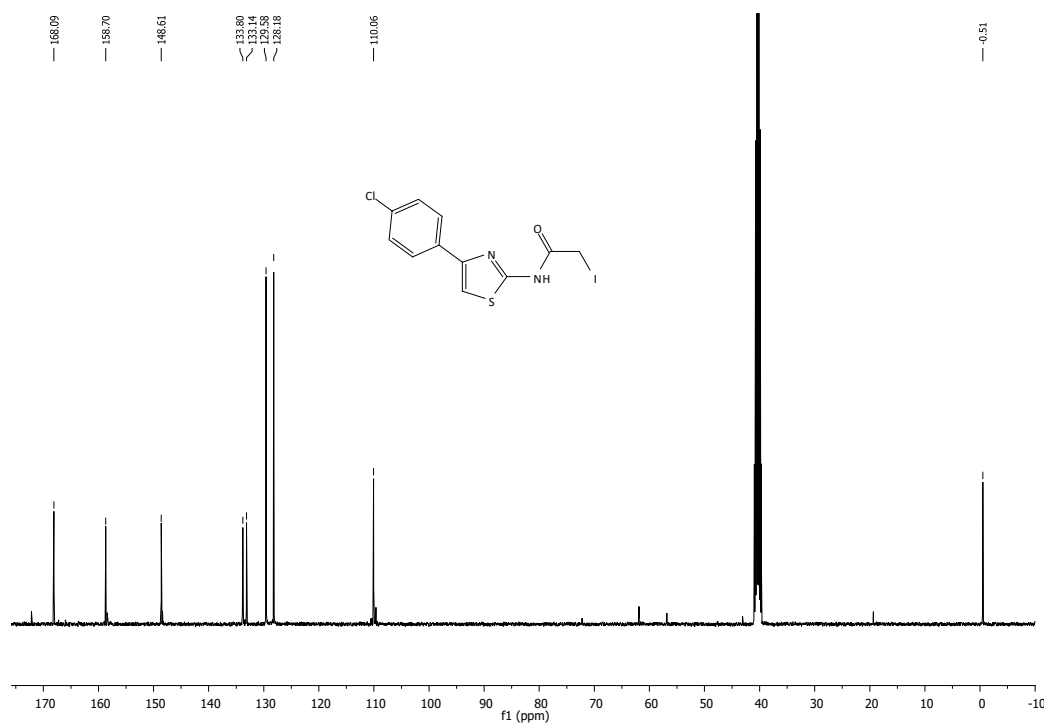

**Fig. S43.** <sup>13</sup>C-NMR spectrum of 2-iodo-N-(4-chlorophenylthiazol-2-yl)acetamide (**6d**).

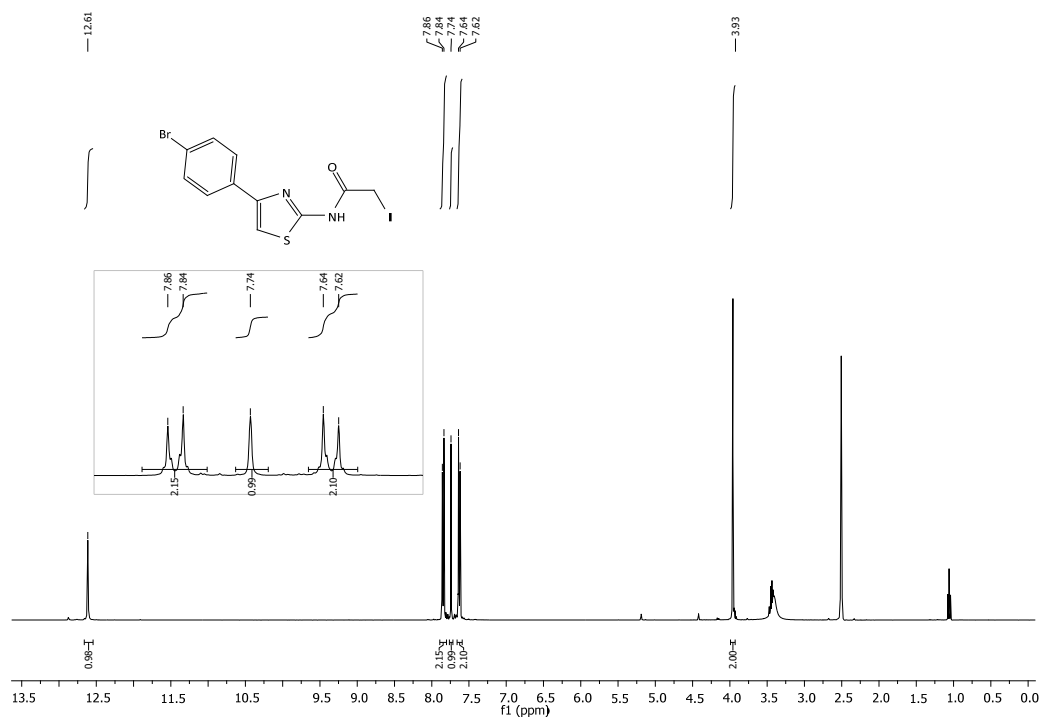

**Fig. S44.** <sup>1</sup>H-NMR spectrum of 2-iodo-N-(4-bromophenylthiazol-2-yl)acetamide (**6e**).

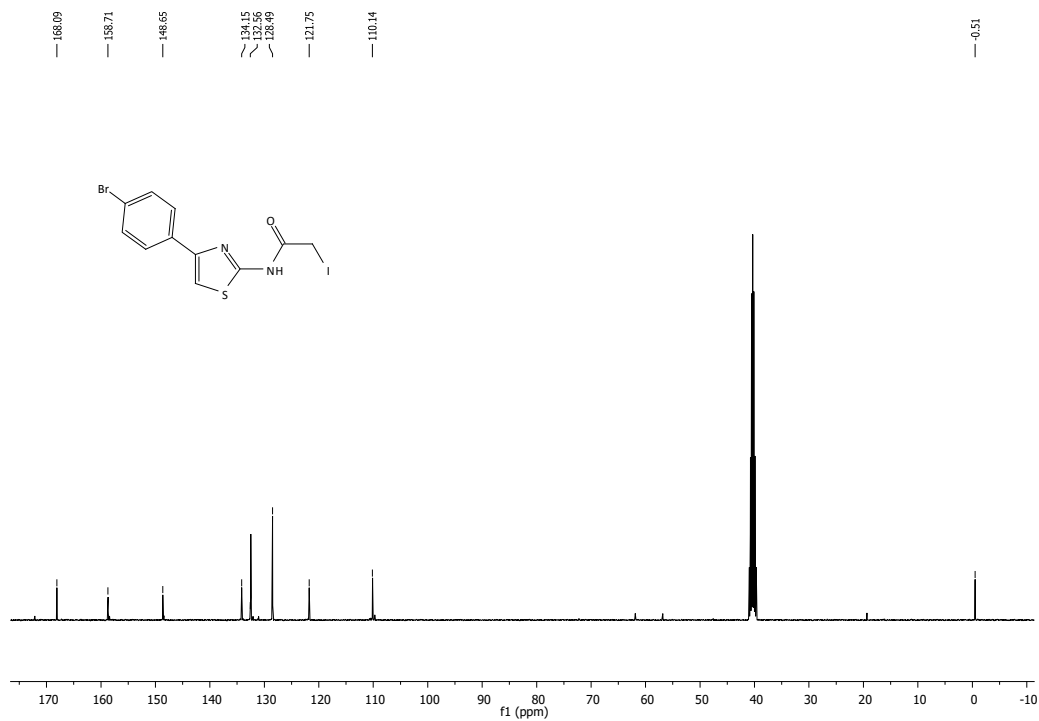

**Fig. S45.** <sup>13</sup>C-NMR spectrum of 2-iodo-N-(4-bromophenylthiazol-2-yl)acetamide (**6e**).

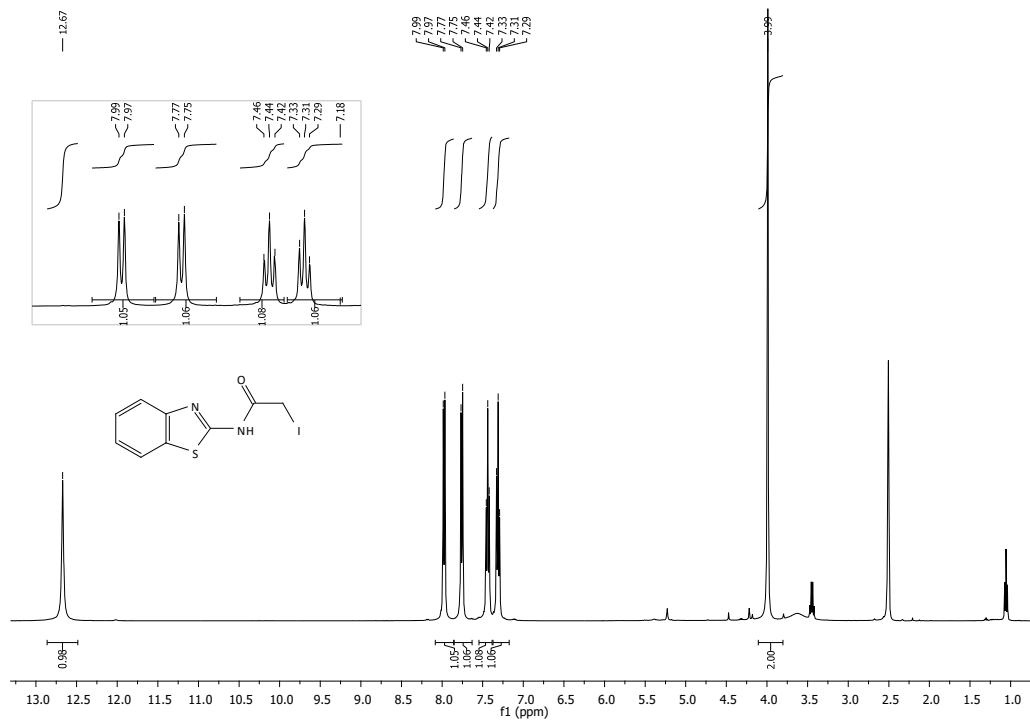

**Fig. S46.** <sup>1</sup>H-NMR spectrum of 2-iodo-N-(benzo[d]thiazol-2-yl)acetamide (**6f**).

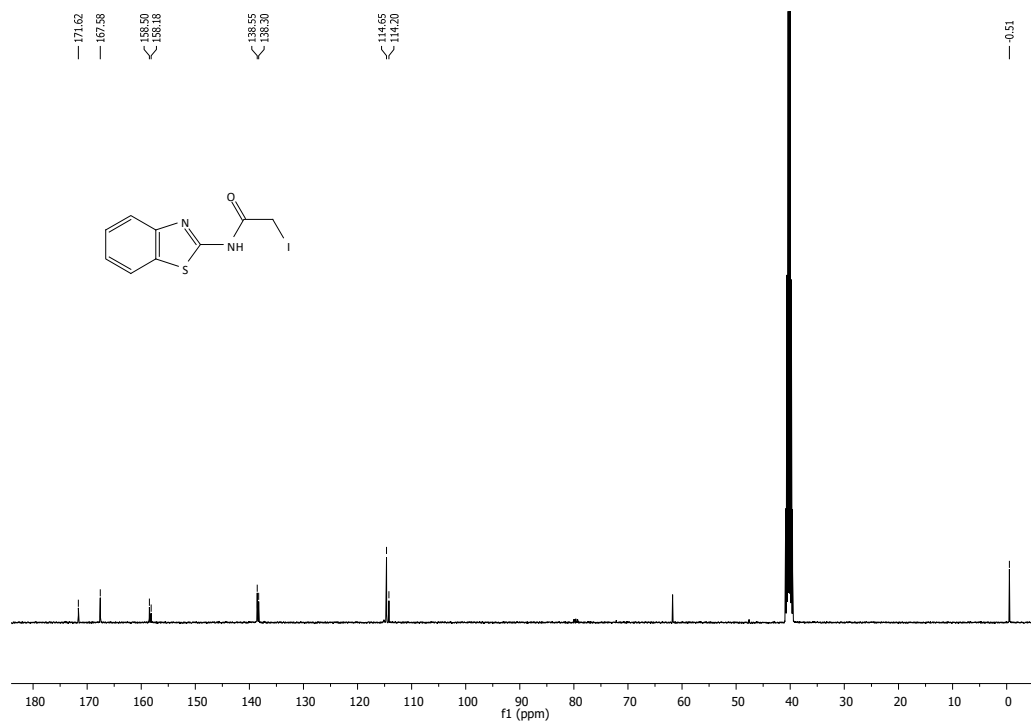

**Fig. S47.** <sup>13</sup>C-NMR spectrum of 2-iodo-N-(benzo[d]thiazol-2-yl)acetamide (**6f**).

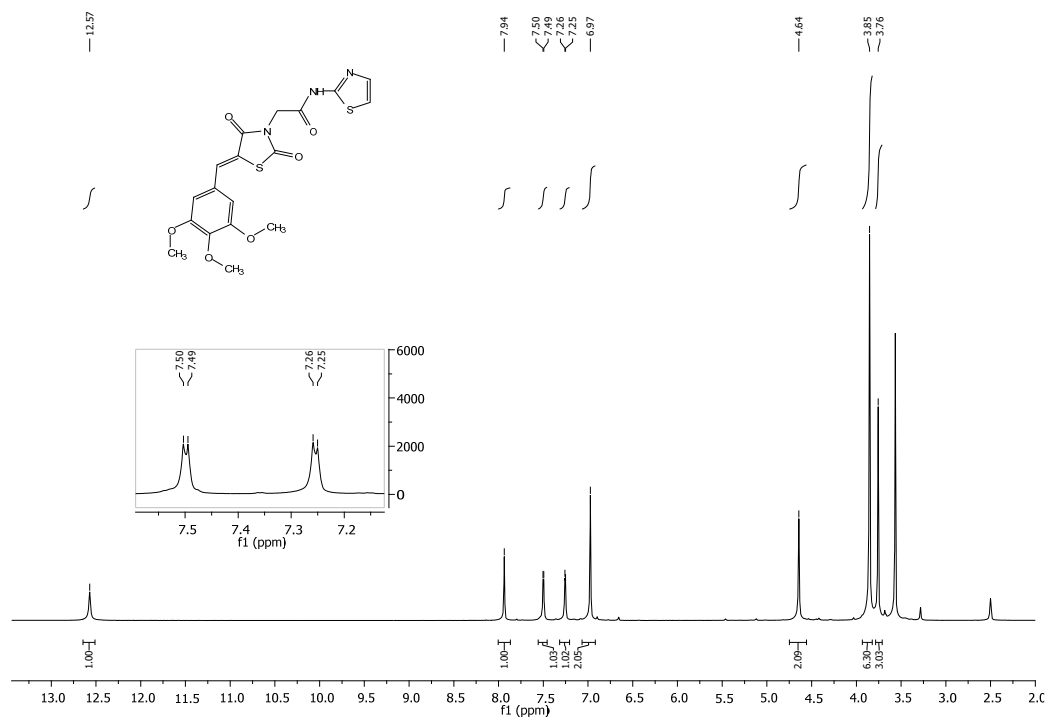

**Fig. S48.** <sup>1</sup>H-NMR spectrum of (Z)-2-(5-(3,4,5-trimethoxybenzylidene)thiazolidine-2,4-dion-3-yl)-N-(thiazole-2-yl)acetamide (**7a**).

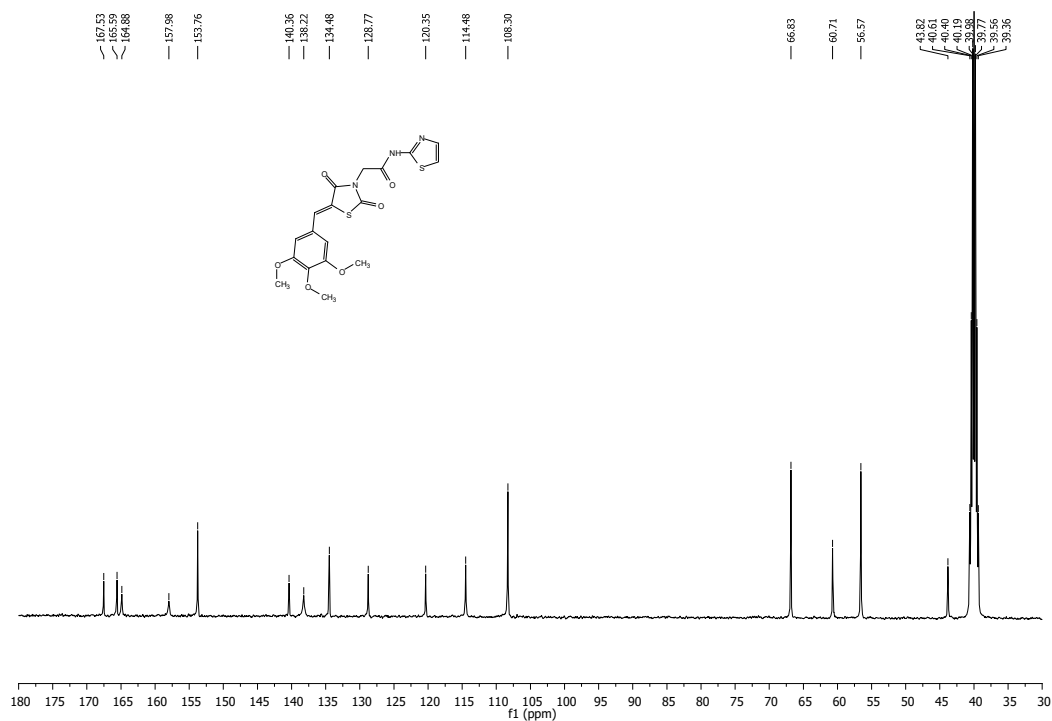

**Fig. S49.** <sup>13</sup>C-NMR spectrum of (Z)-2-(5-(3,4,5-trimethoxybenzlidene)thiazolidine-2,4-dion-3-yl)-N-(thiazole-2-yl)acetamide (**7a**).

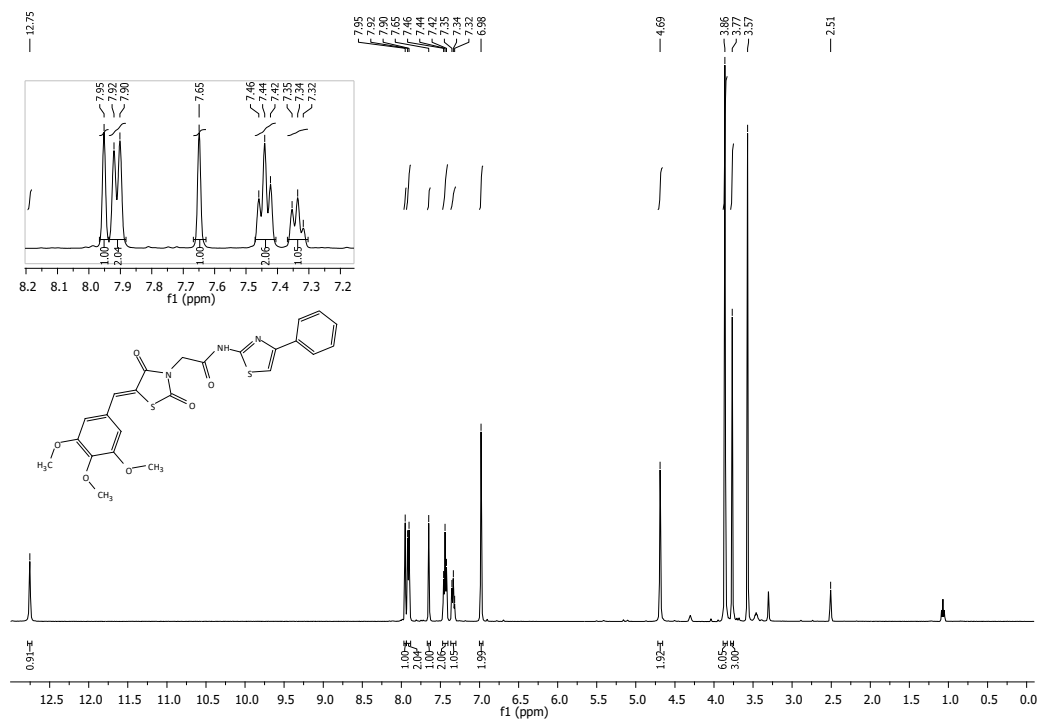

**Fig. S50.** <sup>1</sup>H-NMR spectrum of (Z)-2-(5-(3,4,5-trimethoxybenzlidene)thiazolidine-2,4-dion-3-yl)-N-(4-phenylthiazole-2-yl)acetamide (**7b**).

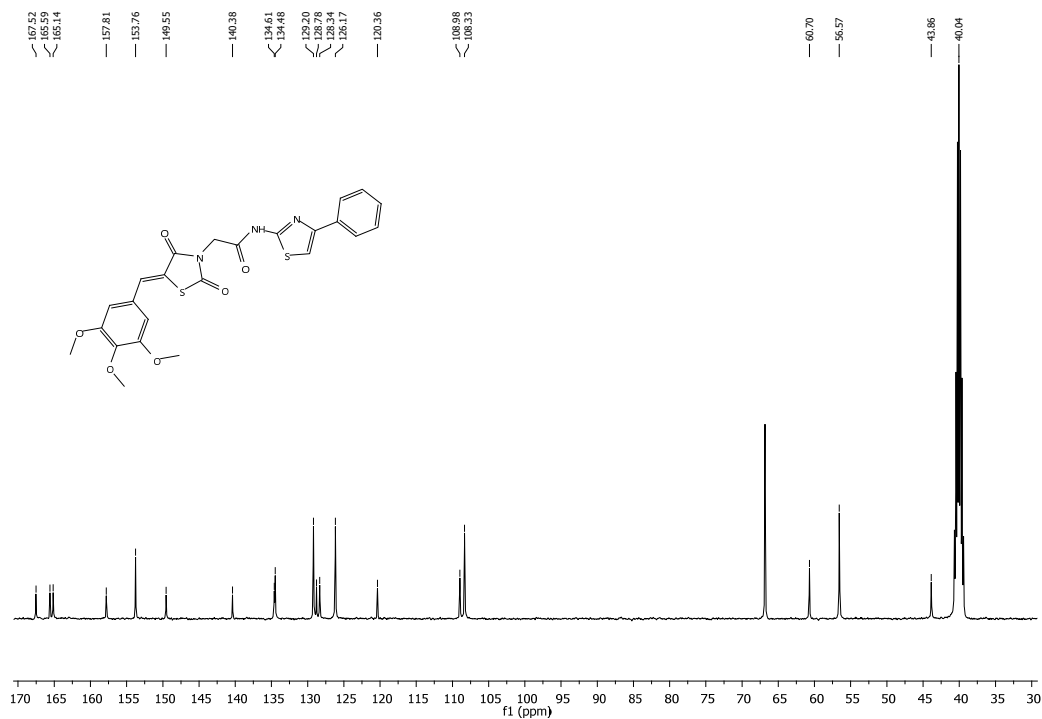

**Fig. S51.** <sup>13</sup>C-NMR spectrum of (Z)-2-(5-(3,4,5-trimethoxybenzylidene)thiazolidine-2,4-dion-3-yl)-N-(4-phenylthiazole-2-yl)acetamide (**7b**).

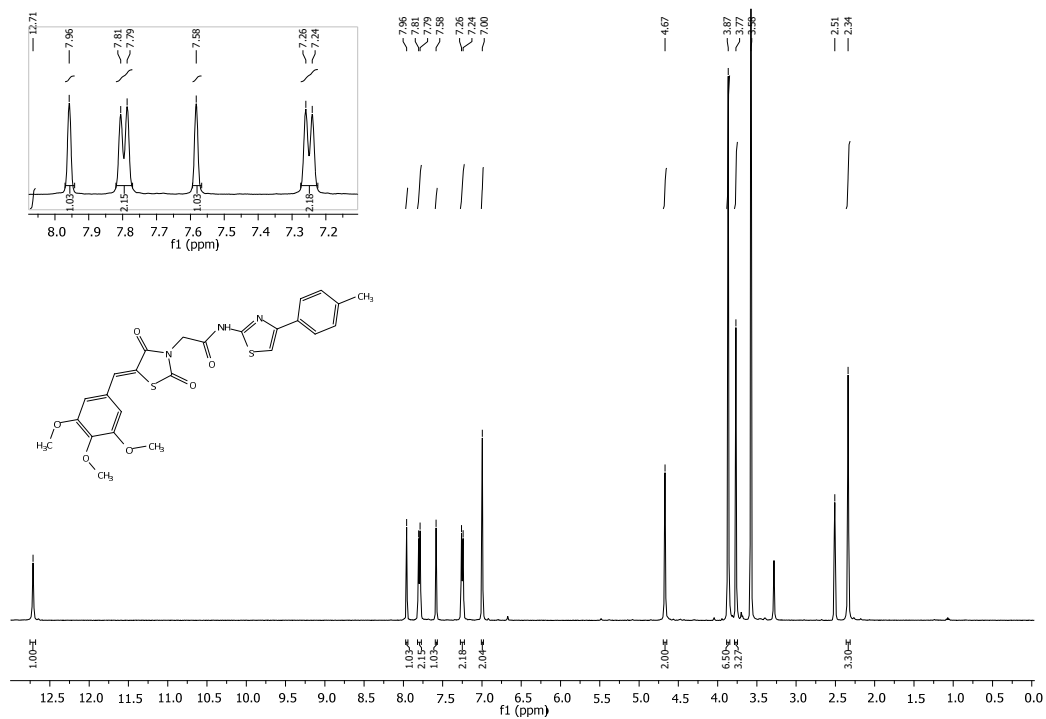

**Fig. S52.** <sup>1</sup>H-NMR spectrum of (Z)-2-(5-(3,4,5-trimethoxybenzylidene)thiazolidine-2,4-dion-3-yl)-N-(4-(4-methylphenyl)thiazole-2-yl)acetamide (**7c**).

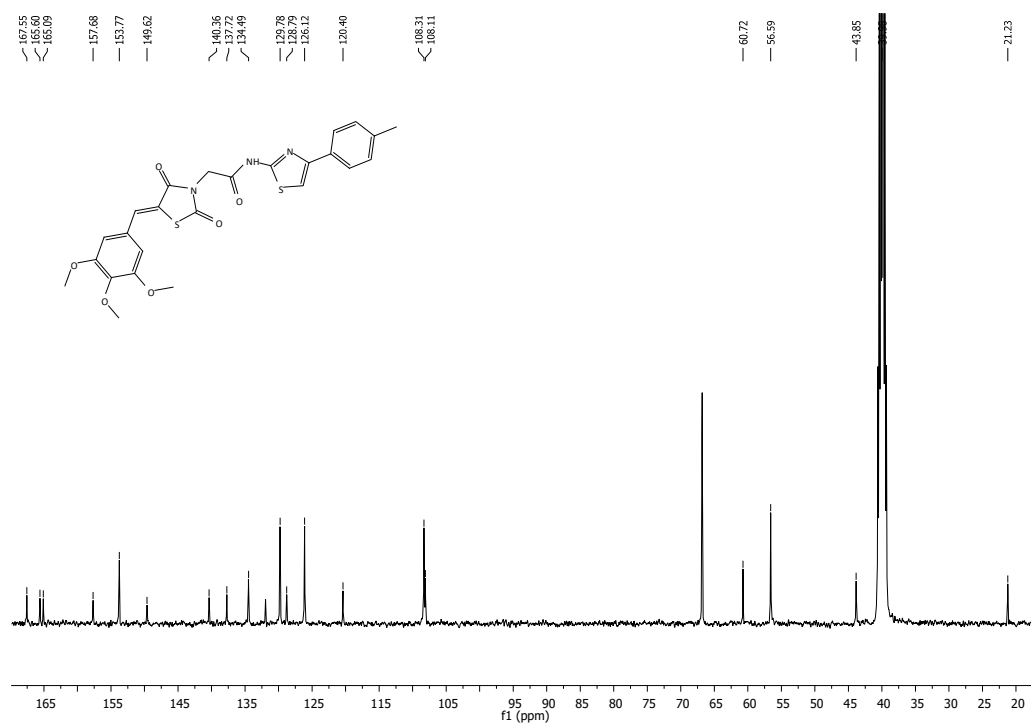

**Fig. S53.**  $^{13}\text{C}$ -NMR spectrum of (Z)-2-(5-(3,4,5-trimethoxybenzylidene)thiazolidin-2,4-dion-3-yl)-N-(4-(4-methylphenyl)thiazol-2-yl)acetamide (7c).

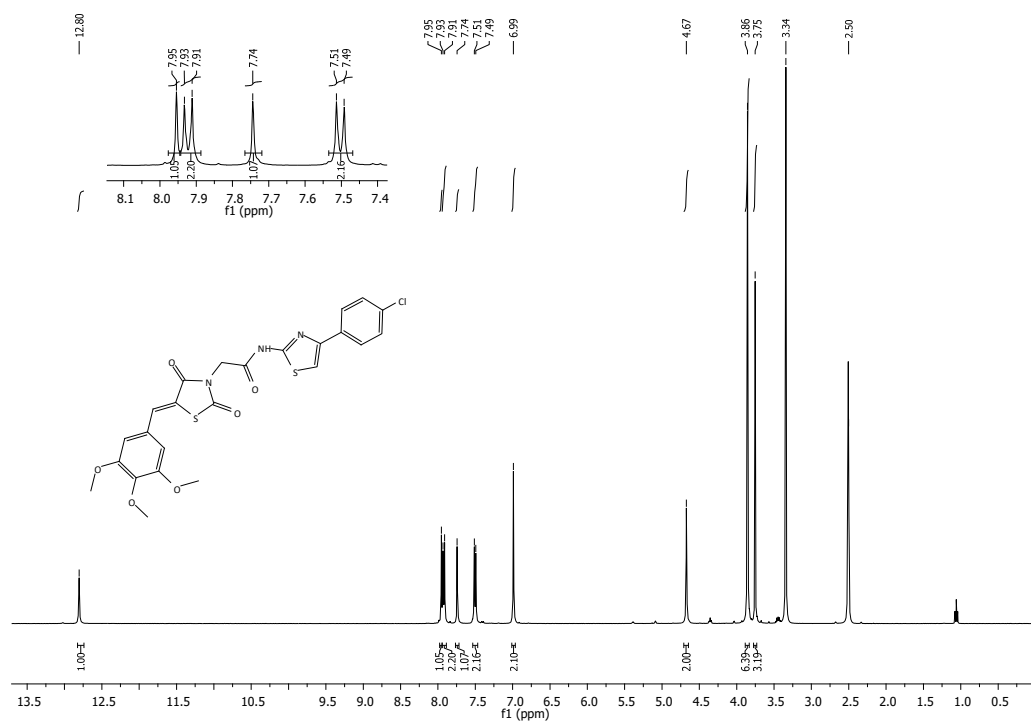

**Fig. S54.**  $^1\text{H}$ -NMR spectrum of (Z)-2-(5-(3,4,5-trimethoxybenzylidene)thiazolidin-2,4-dion-3-yl)-N-(4-(4-chlorophenyl)thiazol-2-yl)acetamide (7d).

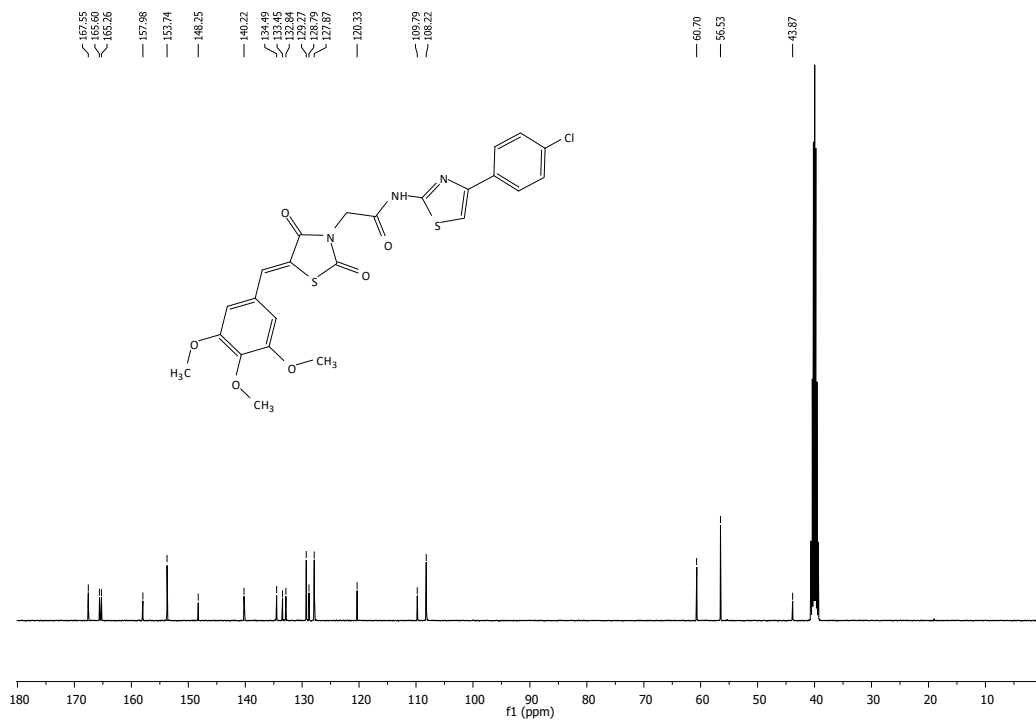

**Fig. S55.**  $^{13}\text{C}$ -NMR spectrum of (Z)-2-(5-(3,4,5-trimethoxybenzylidene)thiazolidin-2,4-dion-3-yl)-N-(4-(4-chlorophenyl)thiazol-2-yl)acetamide (**7d**).

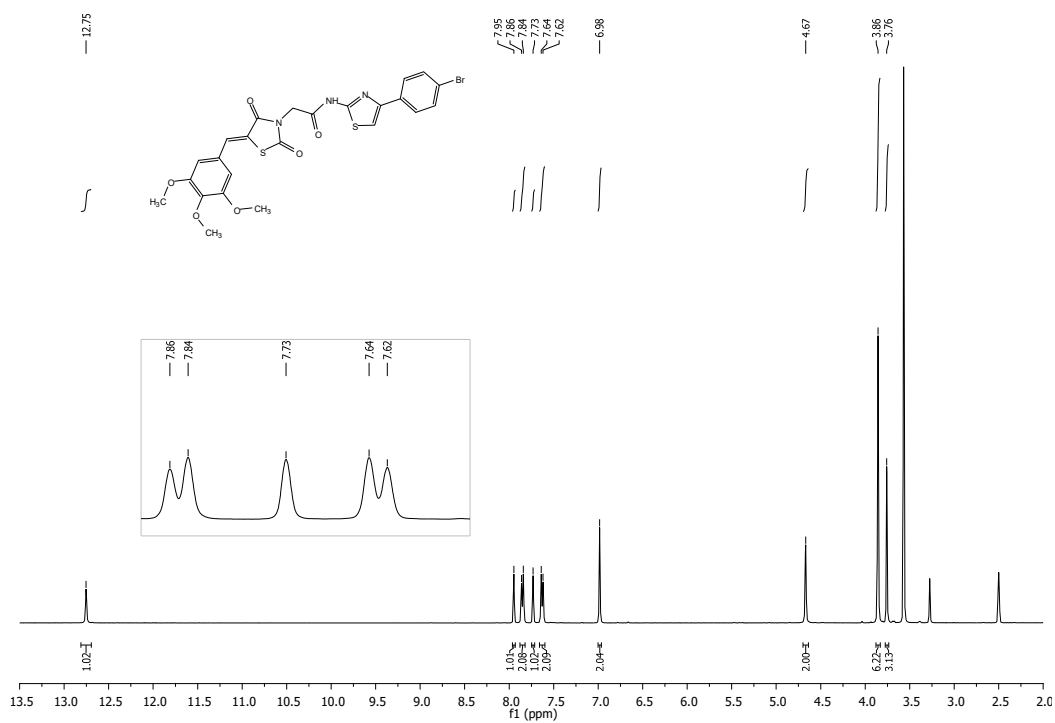

**Fig. S56.**  $^1\text{H}$ -NMR spectrum of (Z)-2-(5-(3,4,5-trimethoxybenzylidene)thiazolidin-2,4-dion-3-yl)-N-(4-(4-bromophenyl)thiazol-2-yl)acetamide (**7e**).

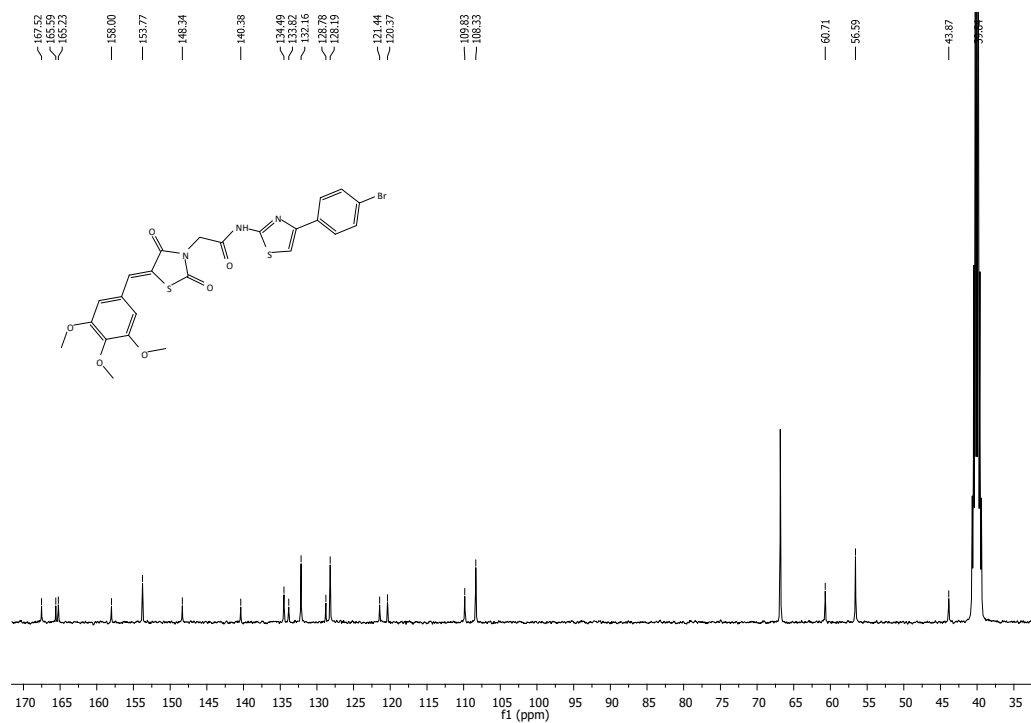

**Fig. S57.** <sup>13</sup>C-NMR spectrum of (Z)-2-(5-(3,4,5-trimethoxybenzylidene)thiazolidin-2,4-dion-3-yl)-N-(4-(4-bromophenyl)thiazol-2-yl)acetamide (7e).

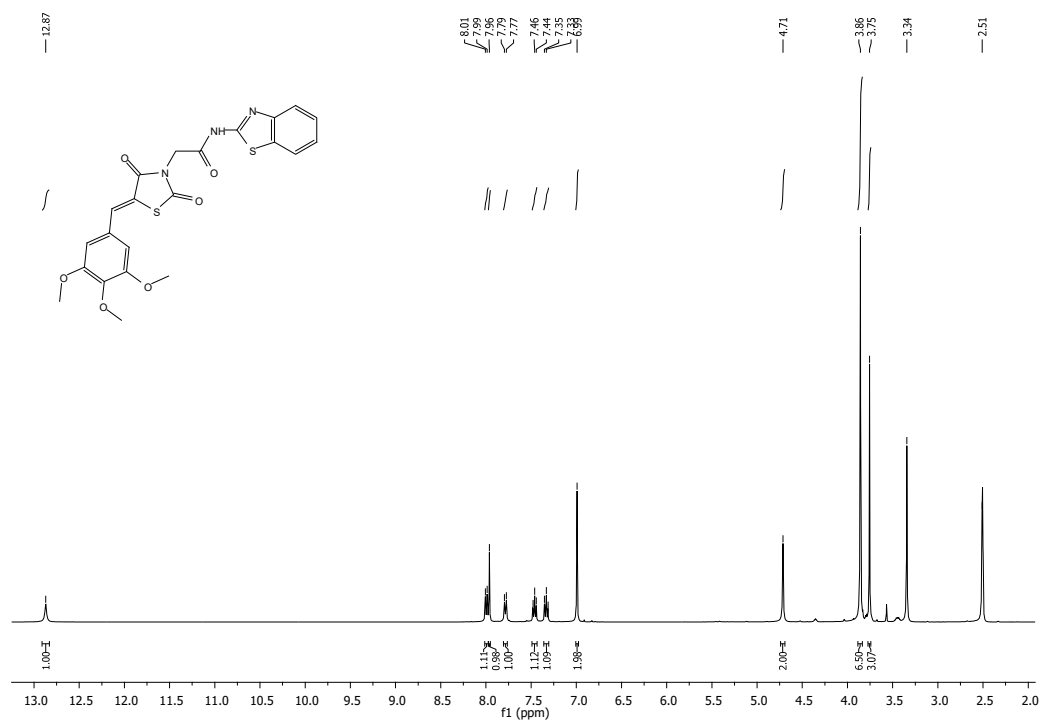

**Fig. S58.** <sup>1</sup>H-NMR spectrum of (Z)-2-(5-(3,4,5-trimethoxybenzylidene)thiazolidin-2,4-dion-3-yl)-N-(benzo[d]thiazol-2-yl)acetamide (7f).



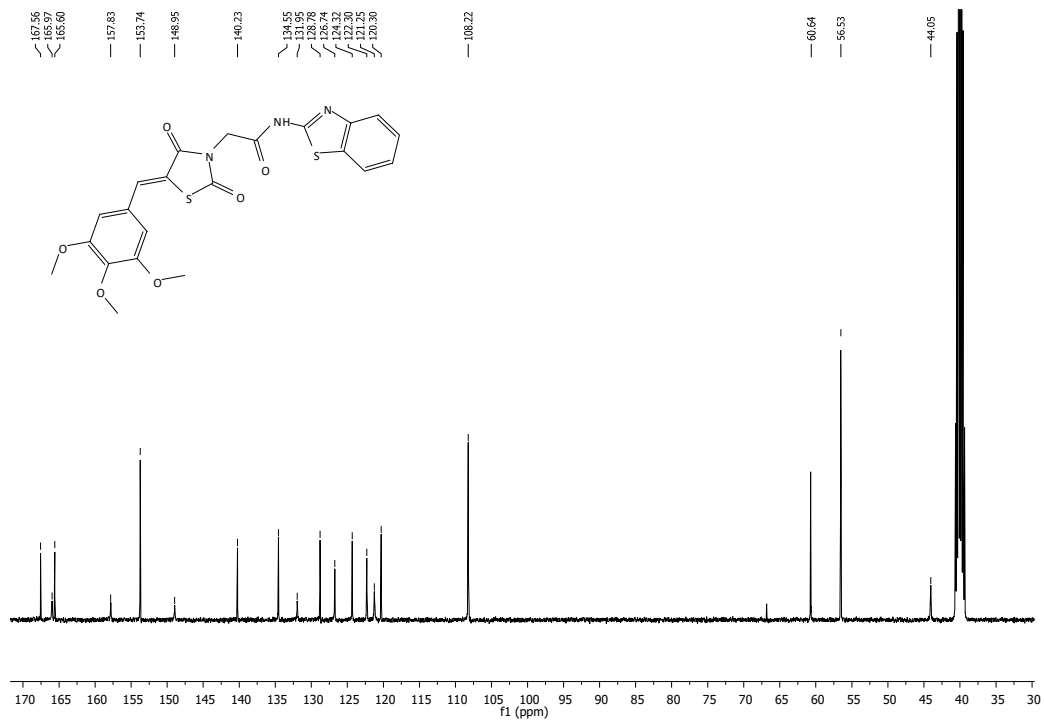

Fig. S59.

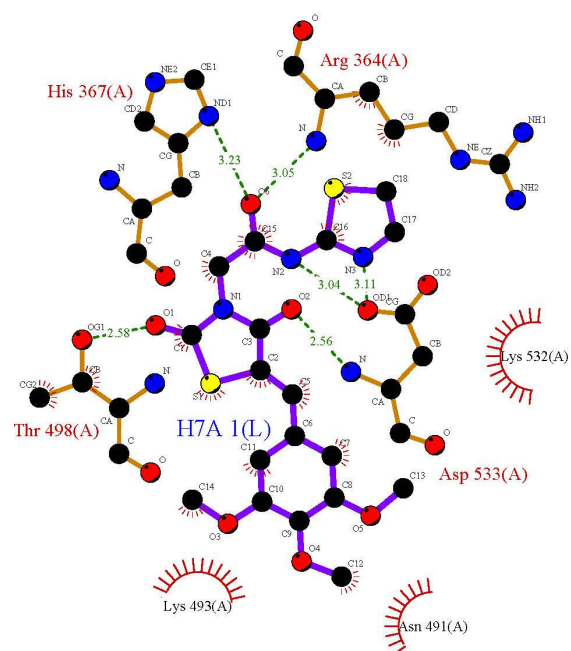

# Key

- |  |                              |  |                                                               |
|--|------------------------------|--|---------------------------------------------------------------|
|  | Ligand bond                  |  | His 53 Non-ligand residues involved in hydrophobic contact(s) |
|  | Non-ligand bond              |  | Corresponding atoms involved in hydrophobic contact(s)        |
|  | Hydrogen bond and its length |  |                                                               |

7a-docked

**Fig. S60.**

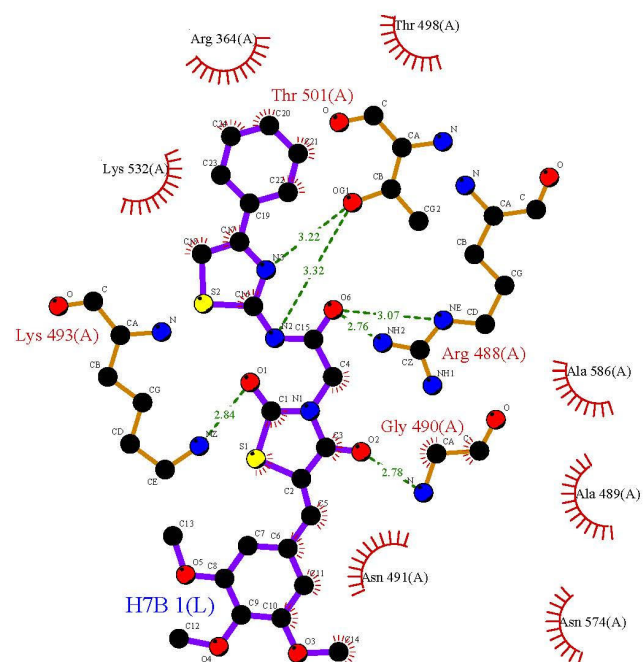

### Key

- ● Ligand bond
- ● Non-ligand bond
- — ● Hydrogen bond and its length
- ⌋ His 53 Non-ligand residues involved in hydrophobic contact(s)
- Corresponding atoms involved in hydrophobic contact(s)

**7b-docked**

Fig. S61.

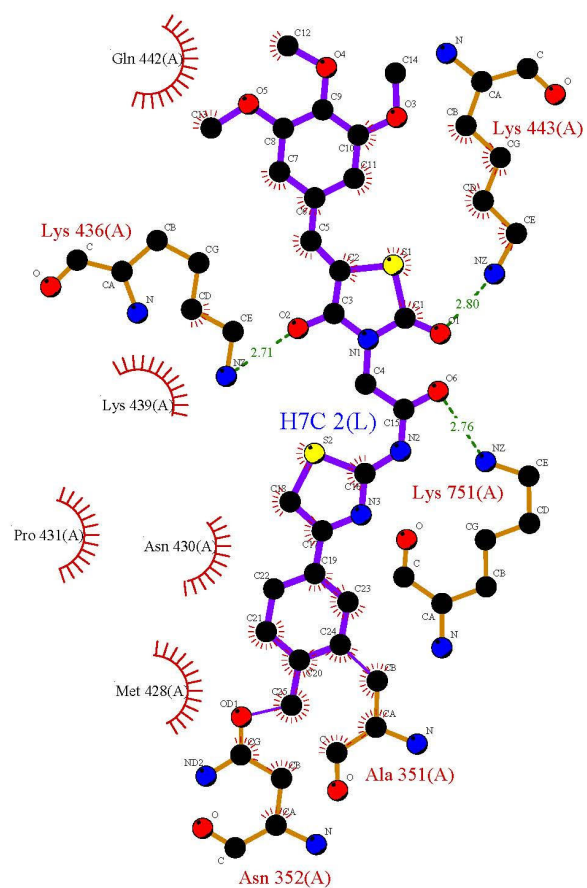

# Key

- |  |                              |  |                                                               |
|--|------------------------------|--|---------------------------------------------------------------|
|  | Ligand bond                  |  | His 53 Non-ligand residues involved in hydrophobic contact(s) |
|  | Non-ligand bond              |  | Corresponding atoms involved in hydrophobic contact(s)        |
|  | Hydrogen bond and its length |  |                                                               |

7c-minE

Fig. S62.

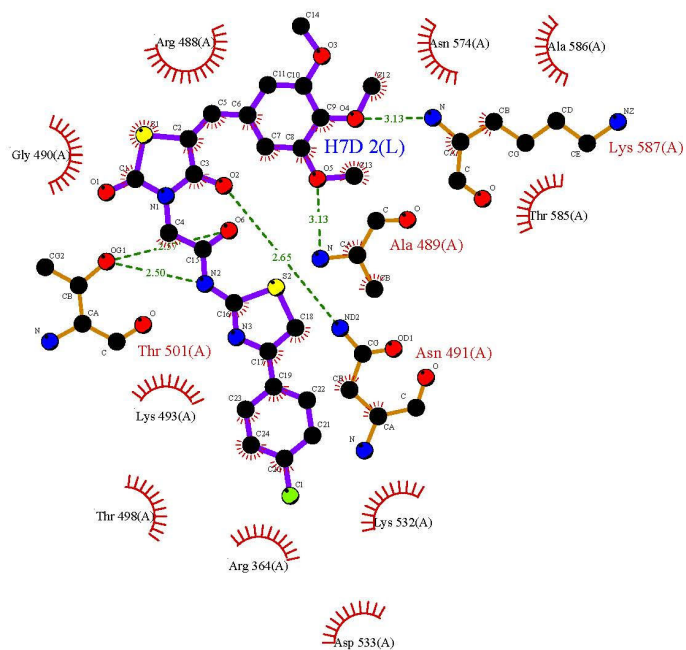

# Key

- ● Ligand bond
- ● Non-ligand bond
- — ● Hydrogen bond and its length
- ⌋ His 53 Non-ligand residues involved in hydrophobic contact(s)
- Corresponding atoms involved in hydrophobic contact(s)

7d-minE

Fig. S63.

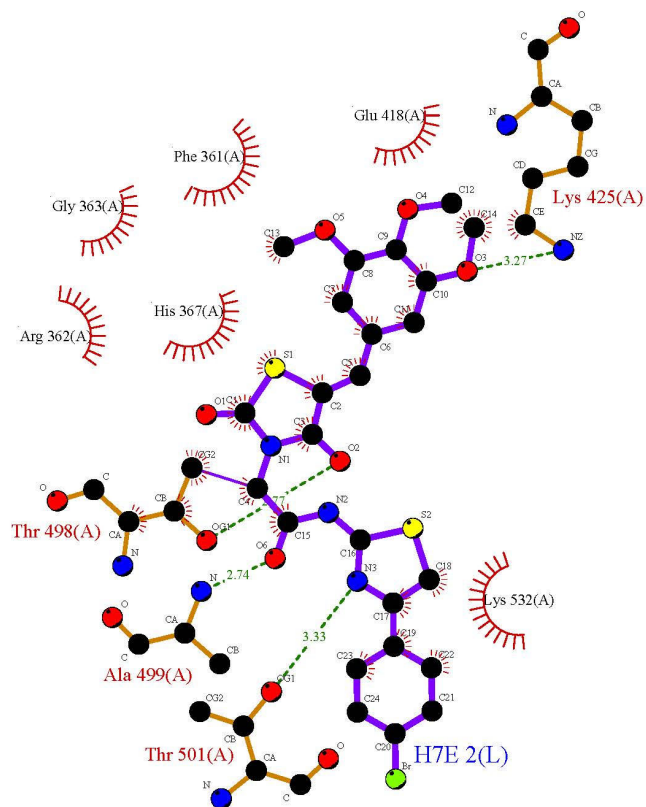

### Key

- ● Ligand bond
- ● Non-ligand bond
- — ● Hydrogen bond and its length
- Non-ligand residues involved in hydrophobic contact(s)
- Corresponding atoms involved in hydrophobic contact(s)

7e-minE

Fig. S64.

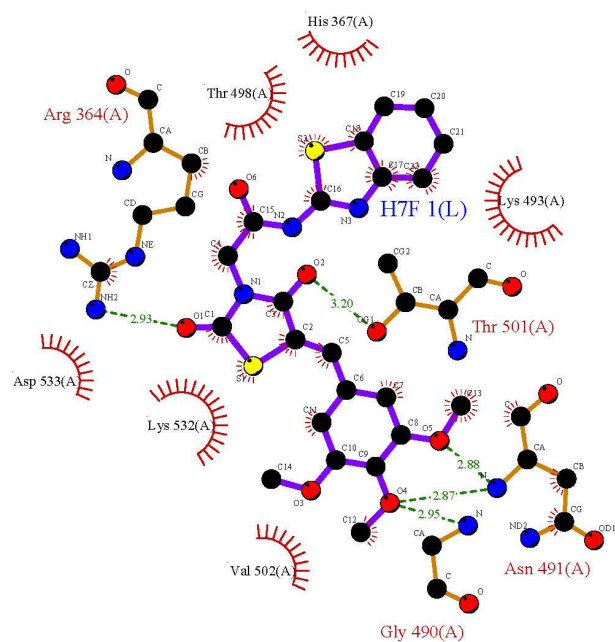

# Key

- — ● Ligand bond
- — ● Non-ligand bond
- — ● Hydrogen bond and its length
- Non-ligand residues involved in hydrophobic contact(s)
- Corresponding atoms involved in hydrophobic contact(s)

7f-maxpop

Fig. S65.

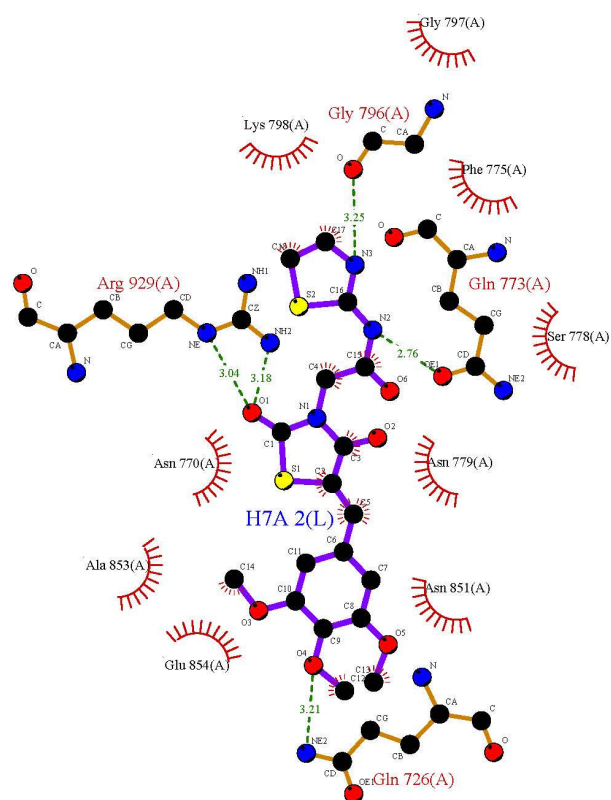

# Key

- ● Ligand bond
- ● Non-ligand bond
- — ● Hydrogen bond and its length
- His 53 Non-ligand residues involved in hydrophobic contact(s)
- Corresponding atoms involved in hydrophobic contact(s)

5gwk-7a



Fig. S66.

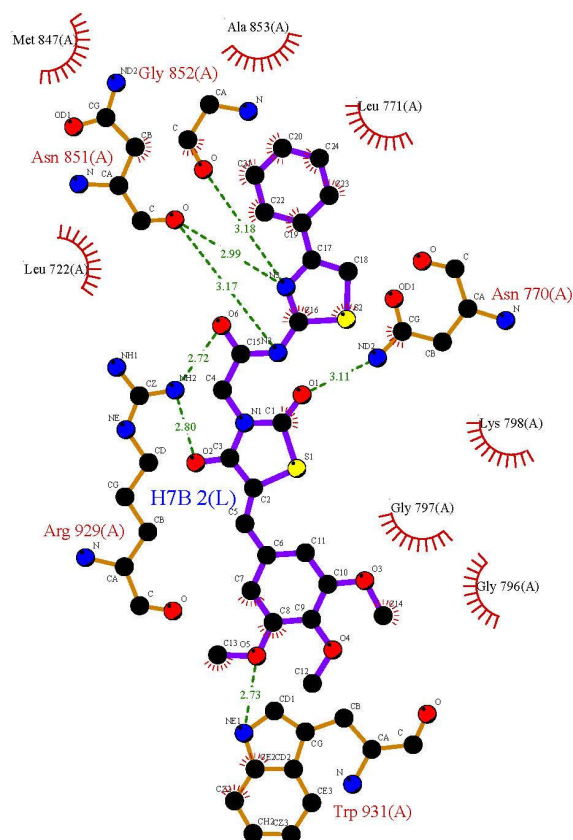

# Key

- — ● Ligand bond
- — ● Non-ligand bond
- — ● Hydrogen bond and its length
- His 53 Non-ligand residues involved in hydrophobic contact(s)
- Corresponding atoms involved in hydrophobic contact(s)

5gwk-7b

Fig. S67.

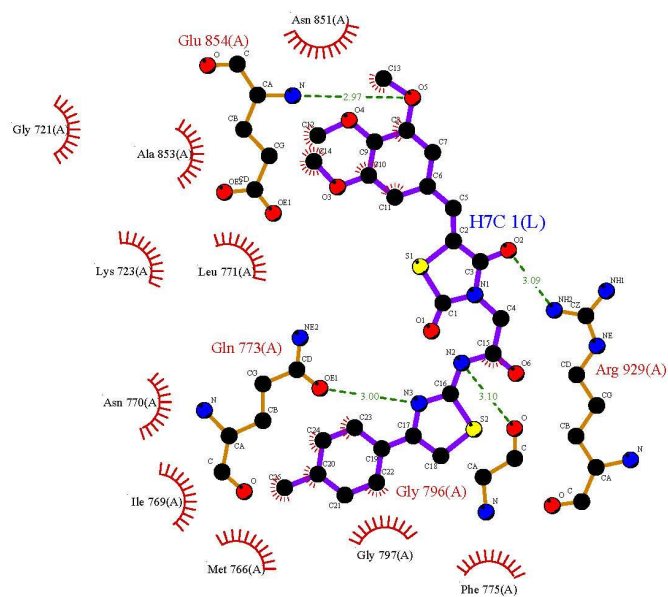

# Key

- — ● Ligand bond
- — ● Non-ligand bond
- — ● Hydrogen bond and its length
- His 53 Non-ligand residues involved in hydrophobic contact(s)
- Corresponding atoms involved in hydrophobic contact(s)

5gwk-7c

**Fig. S68.**

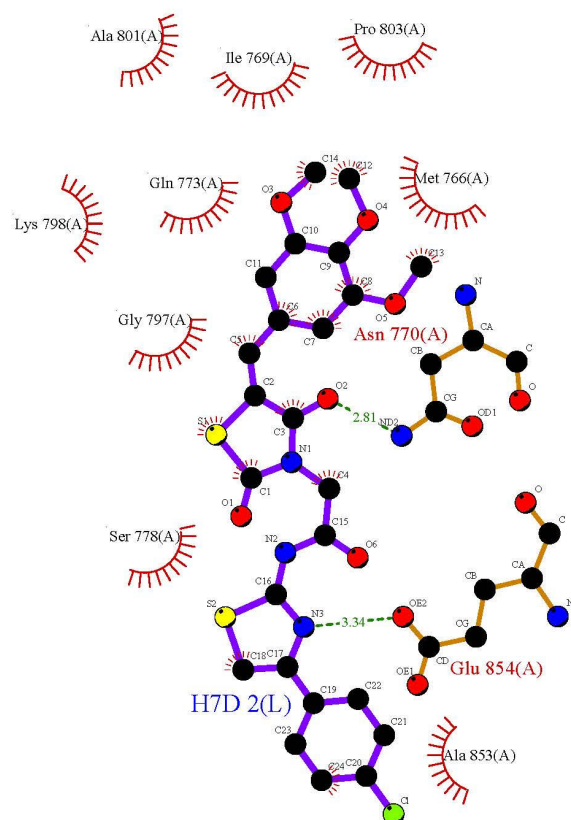

# **Key**

- — ● Ligand bond
- — ● Non-ligand bond
- — ● Hydrogen bond and its length
- Non-ligand residues involved in hydrophobic contact(s)
- Corresponding atoms involved in hydrophobic contact(s)

5gwk-7d

**Fig. S69.**

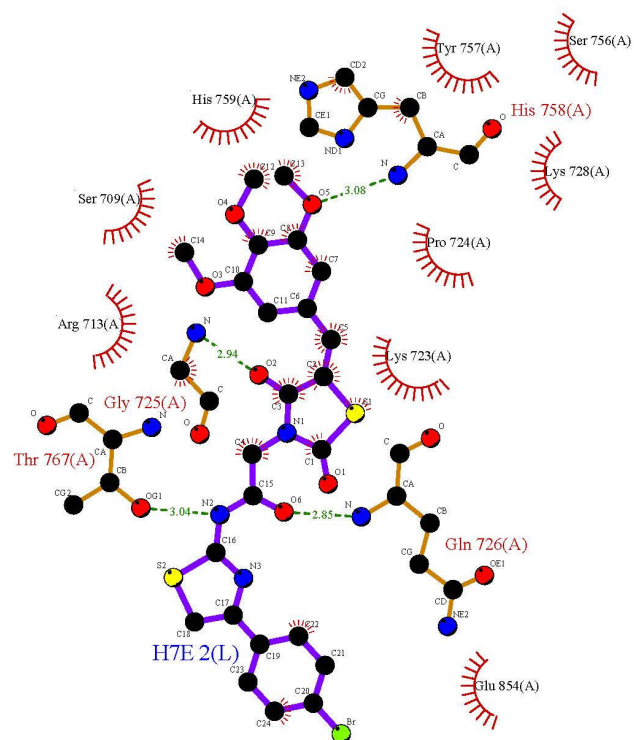

# Key

- — ● Ligand bond
- — ● Non-ligand bond
- — ● Hydrogen bond and its length
- His 53 Non-ligand residues involved in hydrophobic contact(s)
- Corresponding atoms involved in hydrophobic contact(s)

5gwk-7e

Fig. S70.

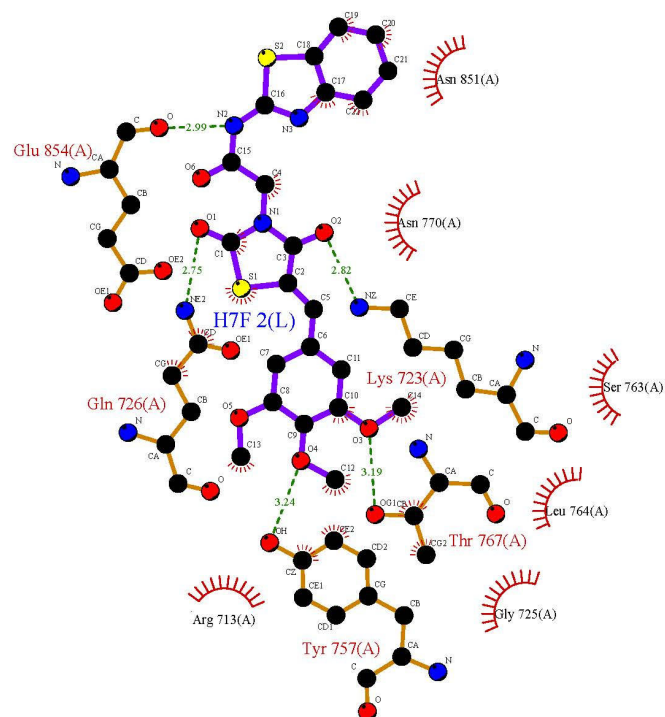

# Key

- |                                                                                                                                                                              |                              |                                                                                            |                                                        |
|------------------------------------------------------------------------------------------------------------------------------------------------------------------------------|------------------------------|--------------------------------------------------------------------------------------------|--------------------------------------------------------|
|        | Ligand bond                  |  His 53 | Non-ligand residues involved in hydrophobic contact(s) |
|        | Non-ligand bond              |         | Corresponding atoms involved in hydrophobic contact(s) |
|  3.00  | Hydrogen bond and its length |                                                                                            |                                                        |

5gwk-7f
